# Supplementary material for: Development of targeted photodynamic therapy drugs by combining a zinc phthalocyanine sensitizer with TSPO or EGFR binding groups: the impact of the number of targeting agents on biological activity
Source: Royal Society of Chemistry journal article supplement (doi:10.1039/d3ob00565h), 2023-01-01
Supplement: d3ob00565h1.pdf [file d3ob00565h1.pdf]

## Supporting information materials for

### Development of targeted photodynamic therapy by combining a zinc phthalocyanine sensitizer with TSPO or EGFR binding groups : impact of the number of targeting agents on the biological activity

Isabelle Toubia,<sup>ad#</sup> Christophe Nguyen,<sup>b#</sup> Stéphane Diring,<sup>a</sup> Mélanie Onofre,<sup>b</sup> Morgane Daurat,<sup>c</sup> Corentin Gauthier,<sup>c</sup> Magali Gary-Bobo,<sup>\*b</sup> Marwan Kobeissi,<sup>\*d</sup> Fabrice Odobel<sup>\*a</sup>

<sup>a</sup>CEISAM, Chimie Et Interdisciplinarité, Synthèse, Analyse, Modélisation, CNRS, UMR CNRS 6230, UFR des Sciences et des Techniques ; 2, rue de la Houssinière - BP 92208; 44322 NANTES Cedex 3 (France). E-mail:[Fabrice.Odobel@univ-nantes.fr](mailto:Fabrice.Odobel@univ-nantes.fr)

<sup>b</sup>IBMM, Univ Montpellier, CNRS, ENSCM, Montpellier, France. E-mail : [magali.gary-bobo@inserm.fr](mailto:magali.gary-bobo@inserm.fr)

<sup>c</sup>NanoMedSyn, 15 avenue Charles Flahault, 34293 Montpellier cedex 5

<sup>d</sup>Laboratoire RammalRammal, Equipe de Synthèse Organique Appliquée SOA, Université Libanaise, Faculté des Sciences 5, Nabatieh, Liban. E-mail: [mkobeissi@ul.edu.lb](mailto:mkobeissi@ul.edu.lb)

*#These authors contributed equally to this study.*

## Contents

|                                                      |    |
|------------------------------------------------------|----|
| 1. <sup>1</sup> H NMR spectra .....                  | 2  |
| 2. <sup>13</sup> C NMR spectra .....                 | 8  |
| 3. ES-MS spectra .....                               | 12 |
| 4. UV absorption spectra of targeting moieties ..... | 19 |
| 5. HPLC analyses .....                               | 20 |

## 1. $^1\text{H}$ NMR spectra

$^{13}\text{C}$  NMR spectra are not included because a suitable signal-to-noise ratio could not be recorded due to solubility issues.

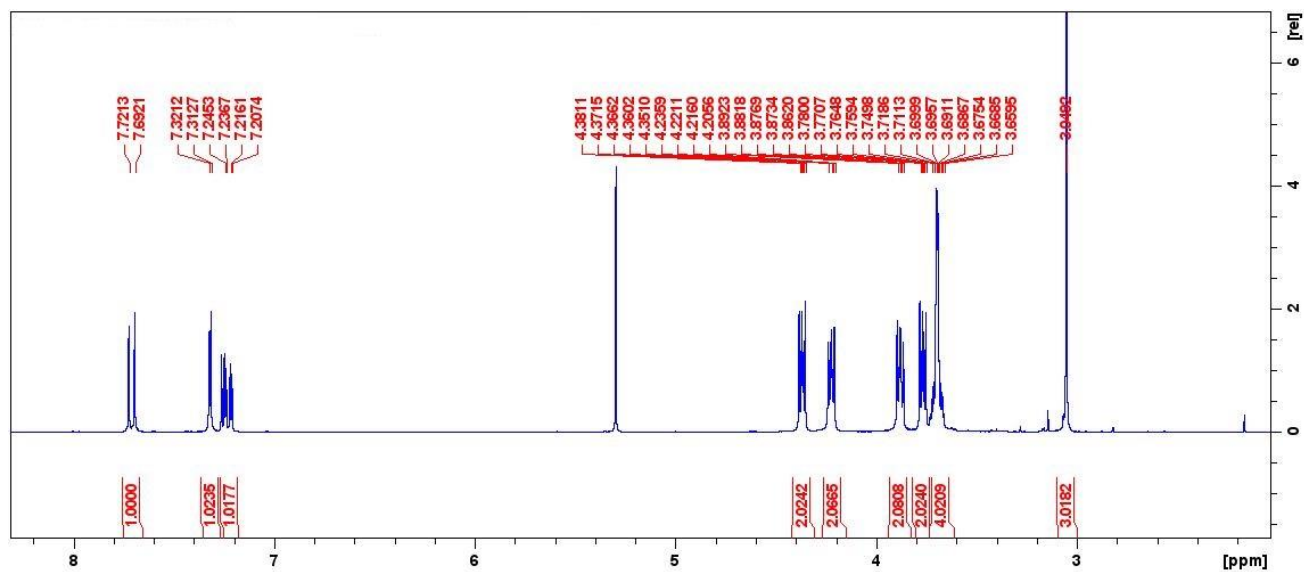

Figure S1.  $^1\text{H}$  NMR spectrum of phthalonitrile **2** recorded in  $\text{CDCl}_3$ .

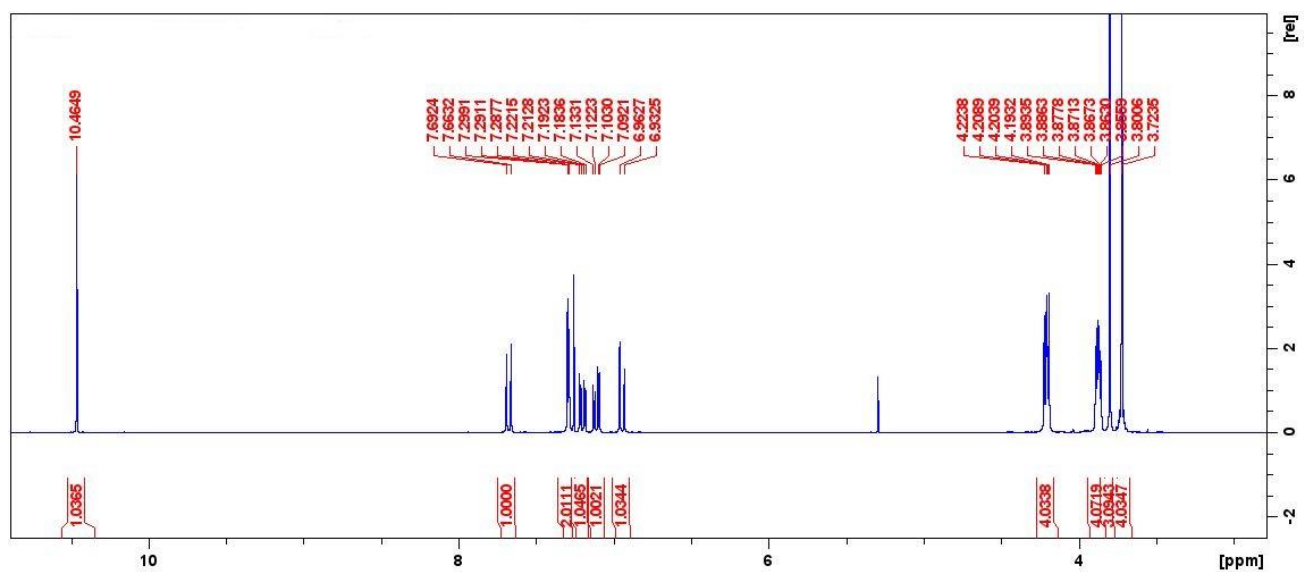

Figure S2.  $^1\text{H}$  NMR spectrum of phthalonitrile **3** recorded in  $\text{CDCl}_3$ .

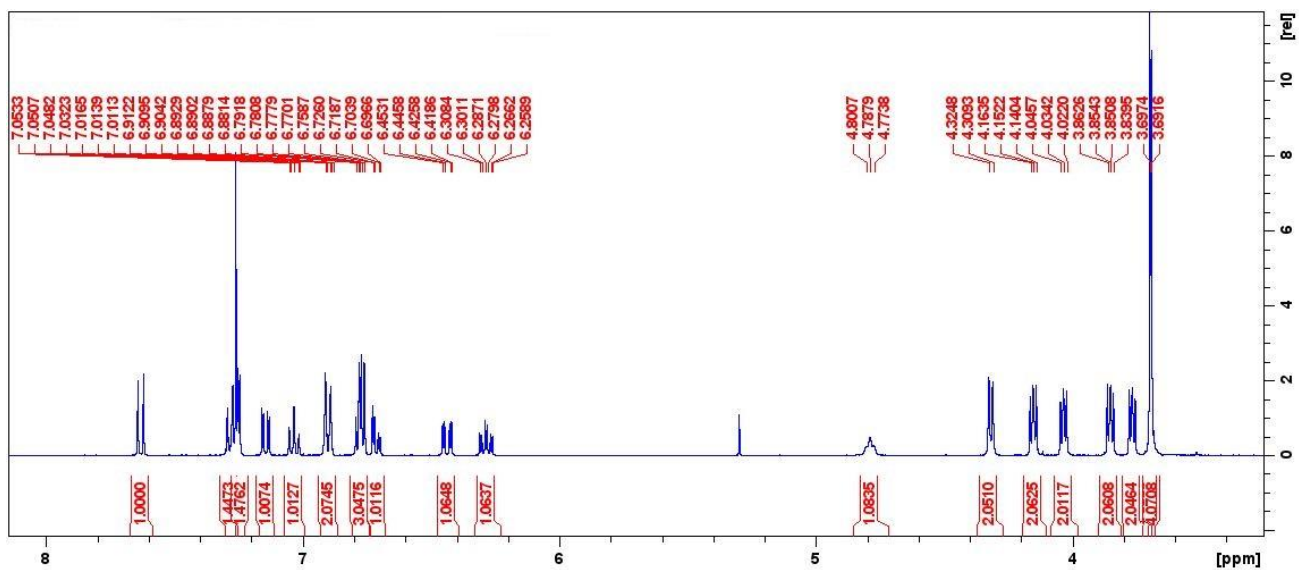

Figure S3. <sup>1</sup>H NMR spectrum of phthalonitrile 5 recorded in CDCl<sub>3</sub>.

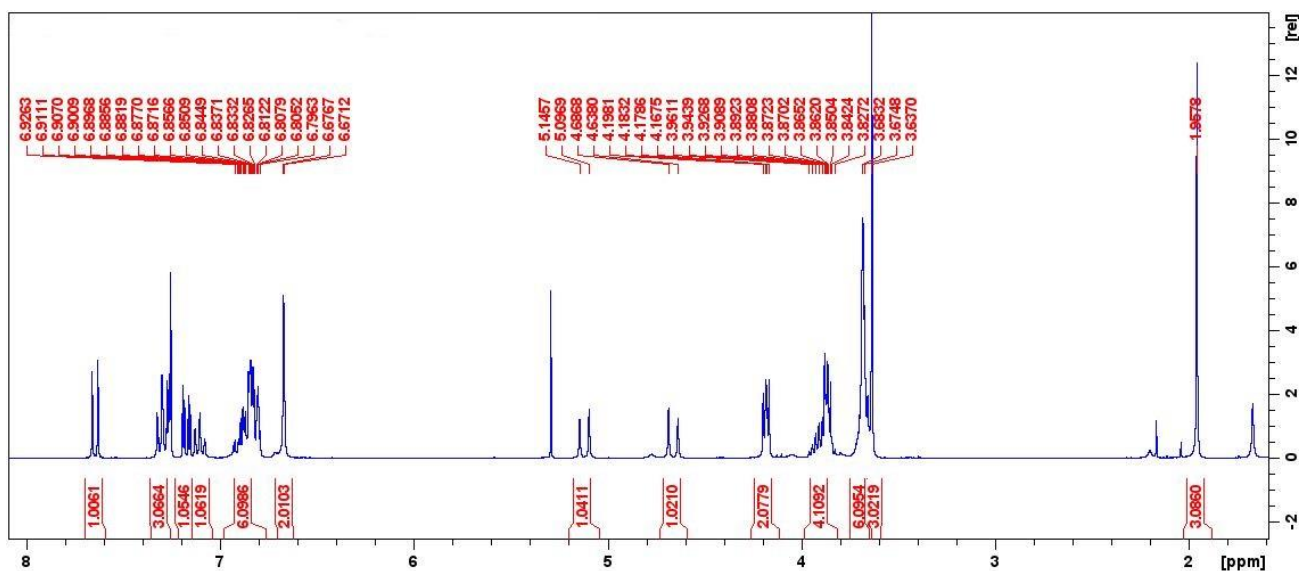

Figure S4. <sup>1</sup>H NMR spectrum of phthalonitrile 6 recorded in CDCl<sub>3</sub>.

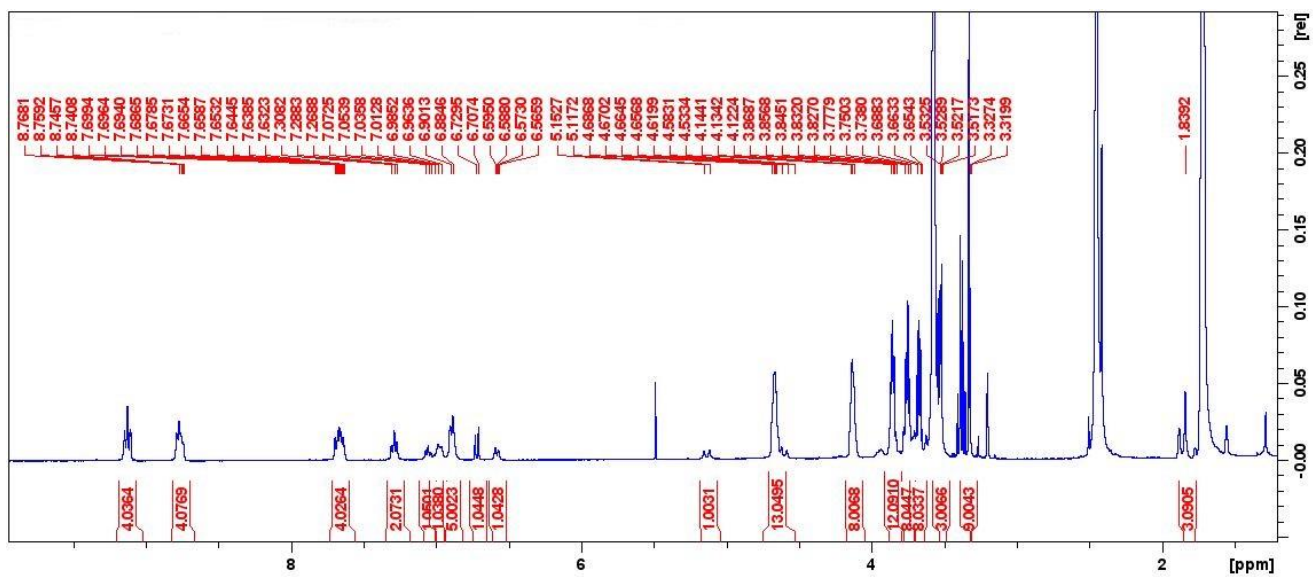

Figure S5.  $^1\text{H}$  NMR spectrum of  $\text{ZnPc-[DAA1106]}_1$  recorded in  $\text{THF-d}_8$ .

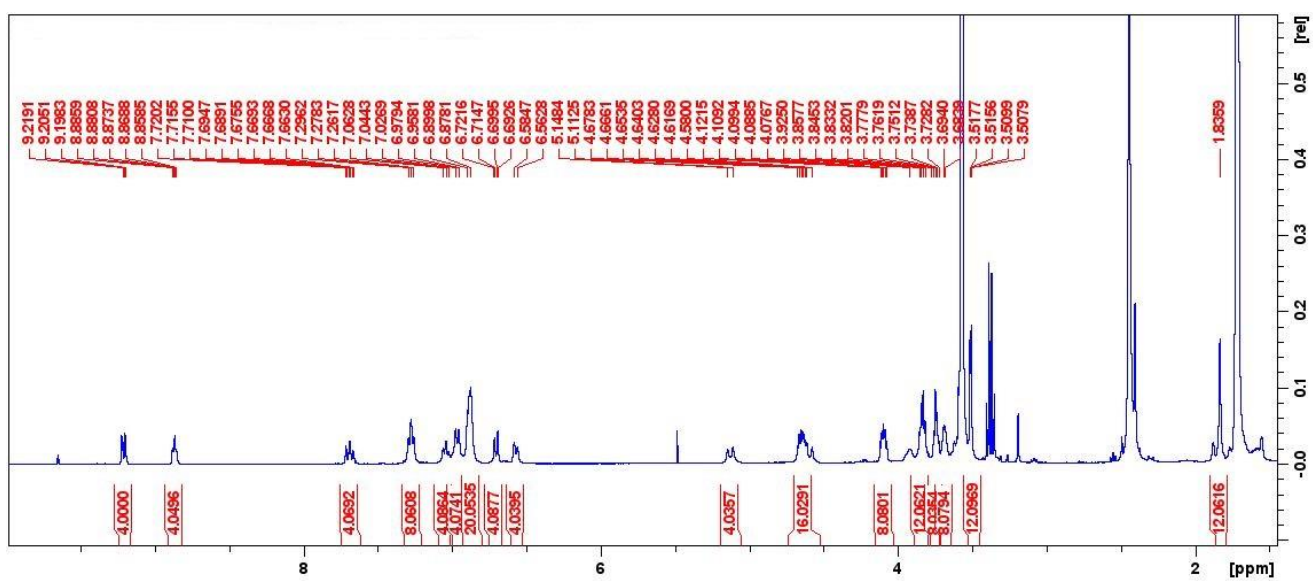

Figure S6.  $^1\text{H}$  NMR spectrum of  $\text{ZnPc-[DAA1106]}_4$  recorded in  $\text{THF-d}_8$ .

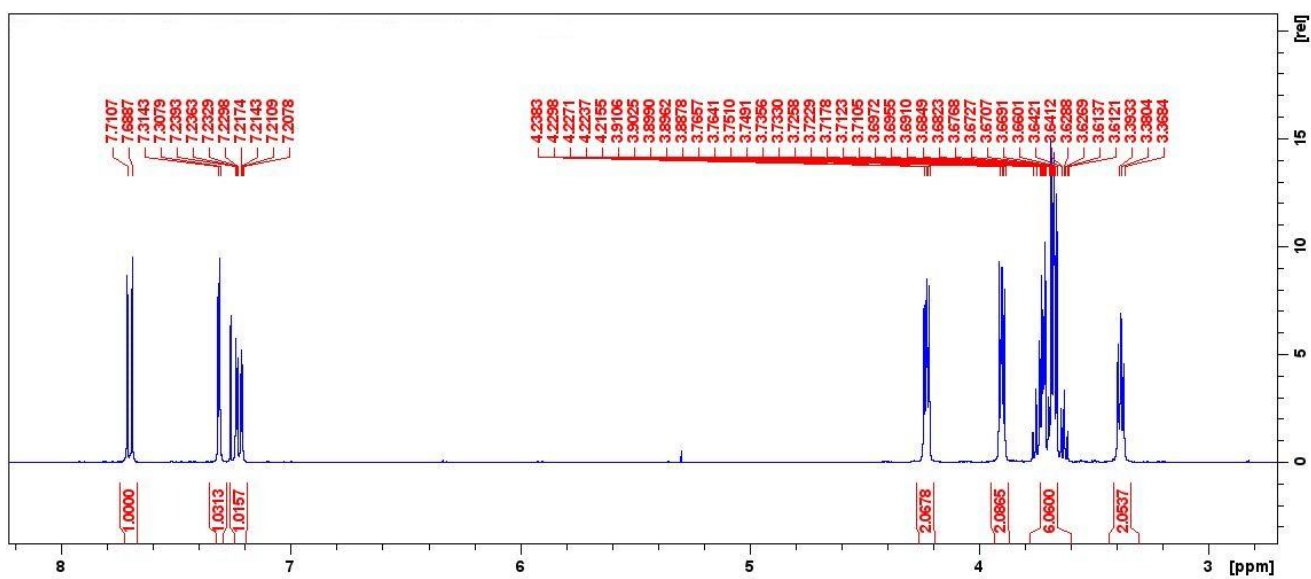

Figure S7.  $^1\text{H}$  NMR spectrum of phthalonitrile **8** recorded in  $\text{CDCl}_3$ .

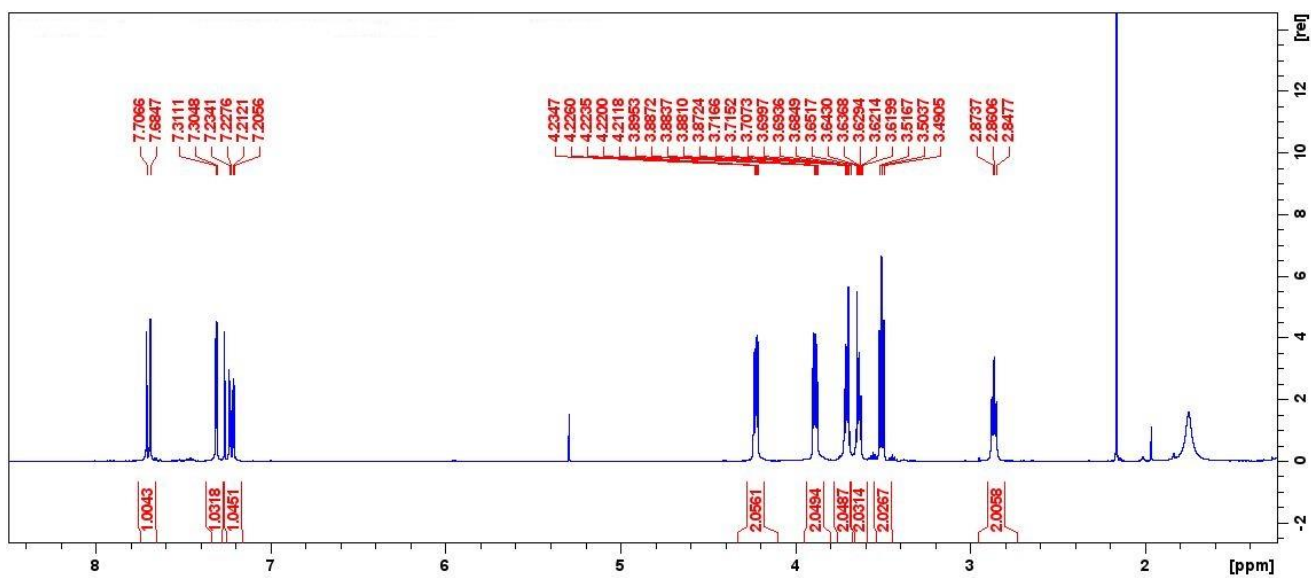

Figure S8.  $^1\text{H}$  NMR spectrum of phthalonitrile **9** recorded in  $\text{CDCl}_3$ .

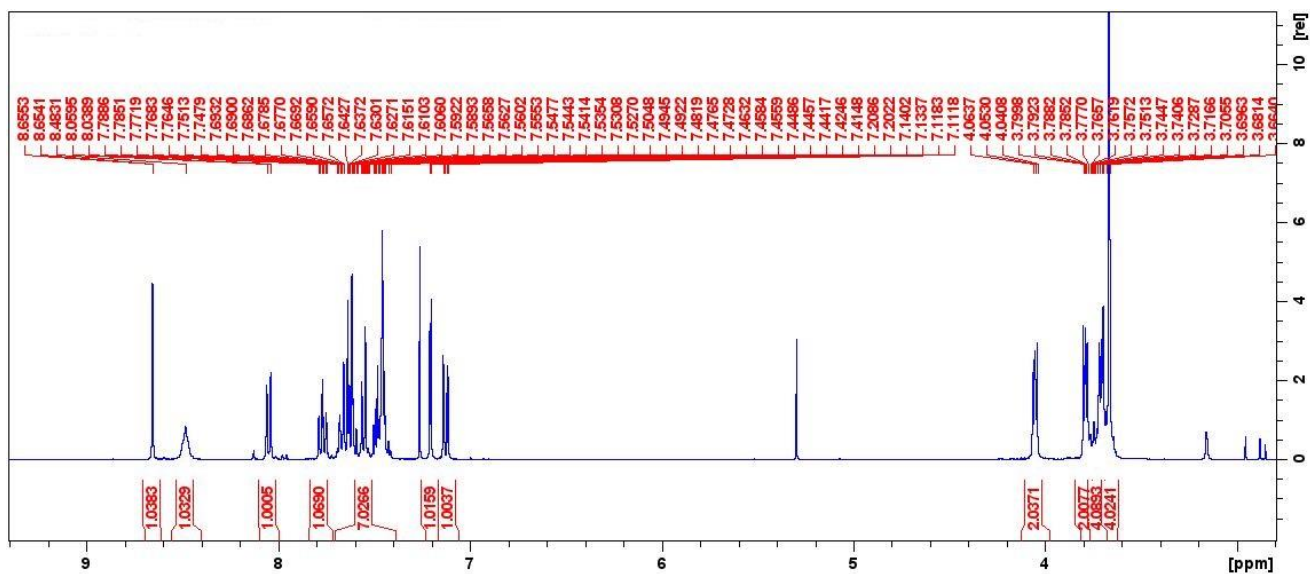

Figure S9.  $^1\text{H}$  NMR spectrum of phthalonitrile **10** recorded in  $\text{CDCl}_3$ .

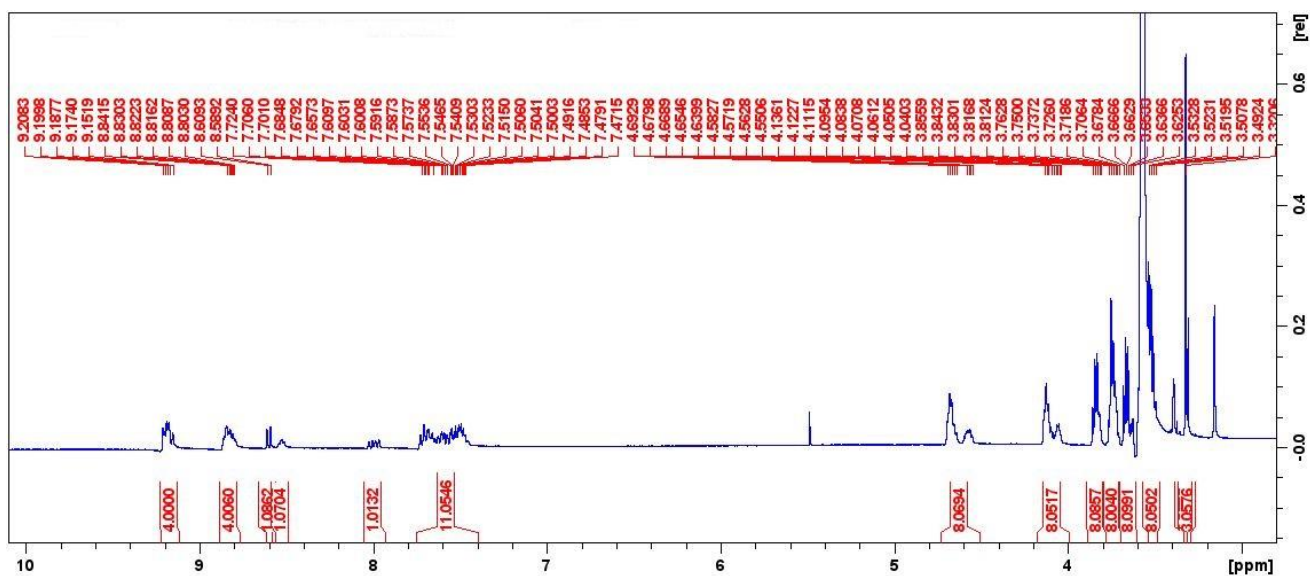

Figure S10.  $^1\text{H}$  NMR spectrum of  $\text{ZnPc}$ -[PK11195]<sub>1</sub> recorded in  $\text{THF-d}_8$ .

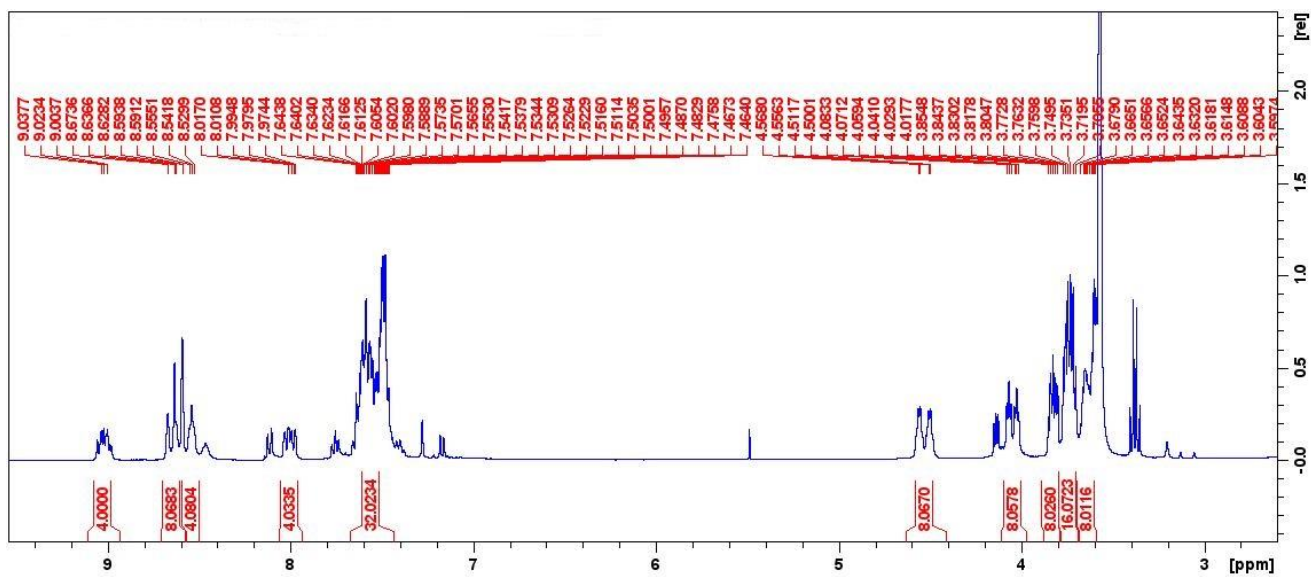

Figure S11.  $^1\text{H}$  NMR spectrum of  $\text{ZnPc-}[\text{PK11195}]_4$  recorded in  $\text{THF-}d_8$ .

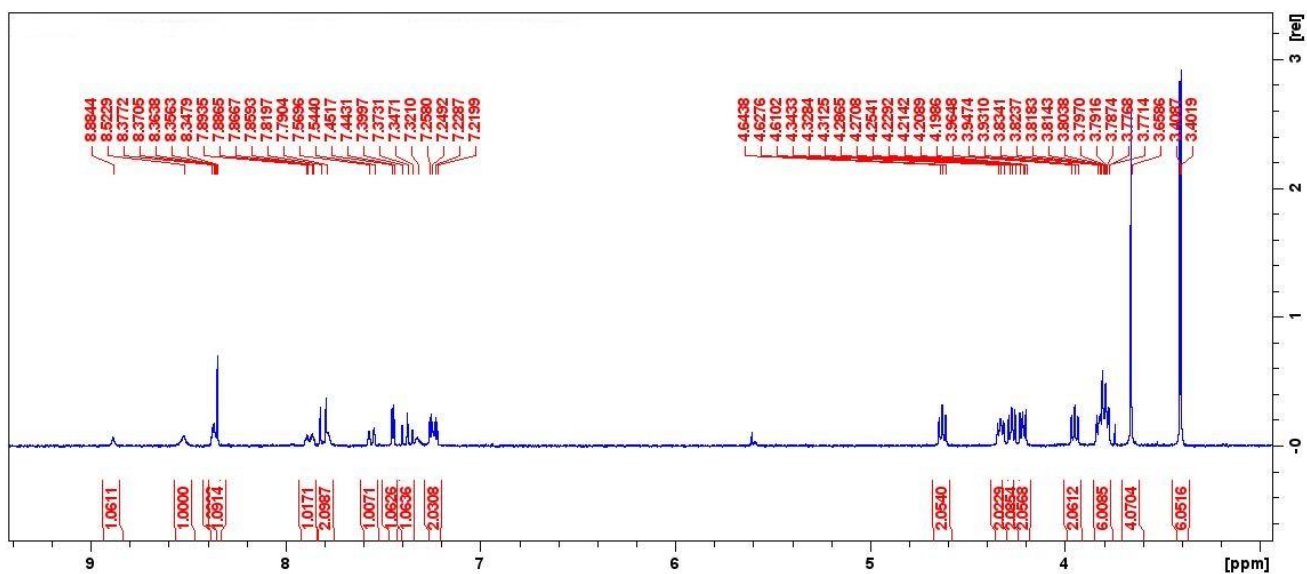

Figure S12.  $^1\text{H}$  NMR spectrum of phthalonitrile **11** recorded in  $\text{Acetone-}d_6$ .

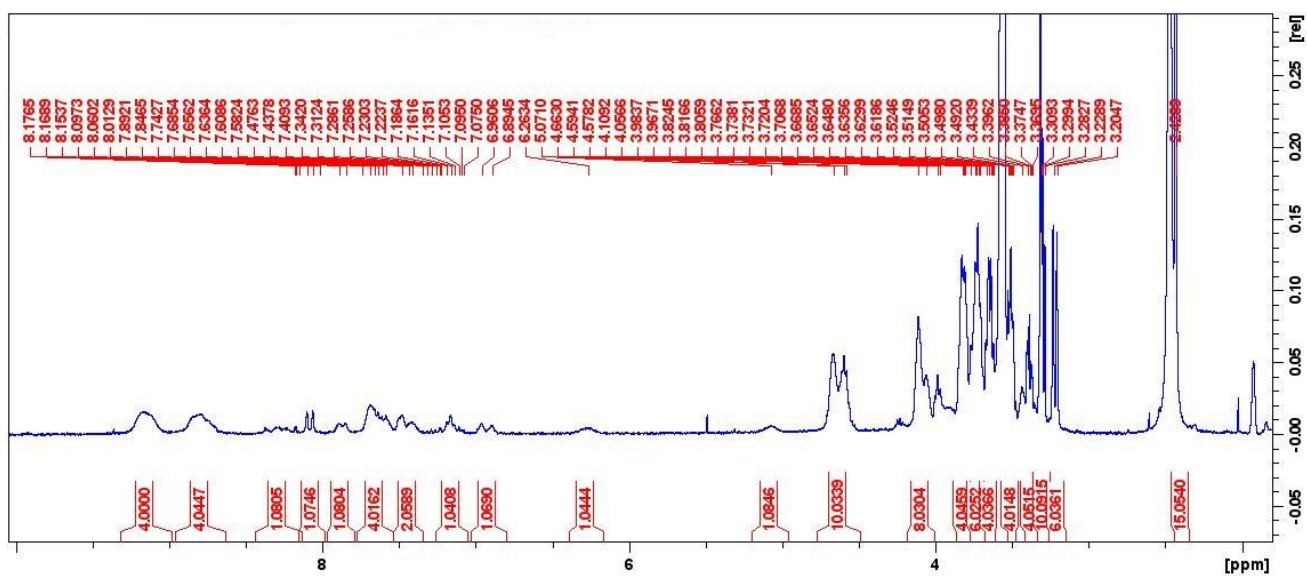

Figure S13.  $^1\text{H}$  NMR spectrum of  $\text{ZnPc-}[\text{Erlø}]_1$  recorded in  $\text{THF-d}_8$ .

## 2. $^{13}\text{C}$ NMR spectra

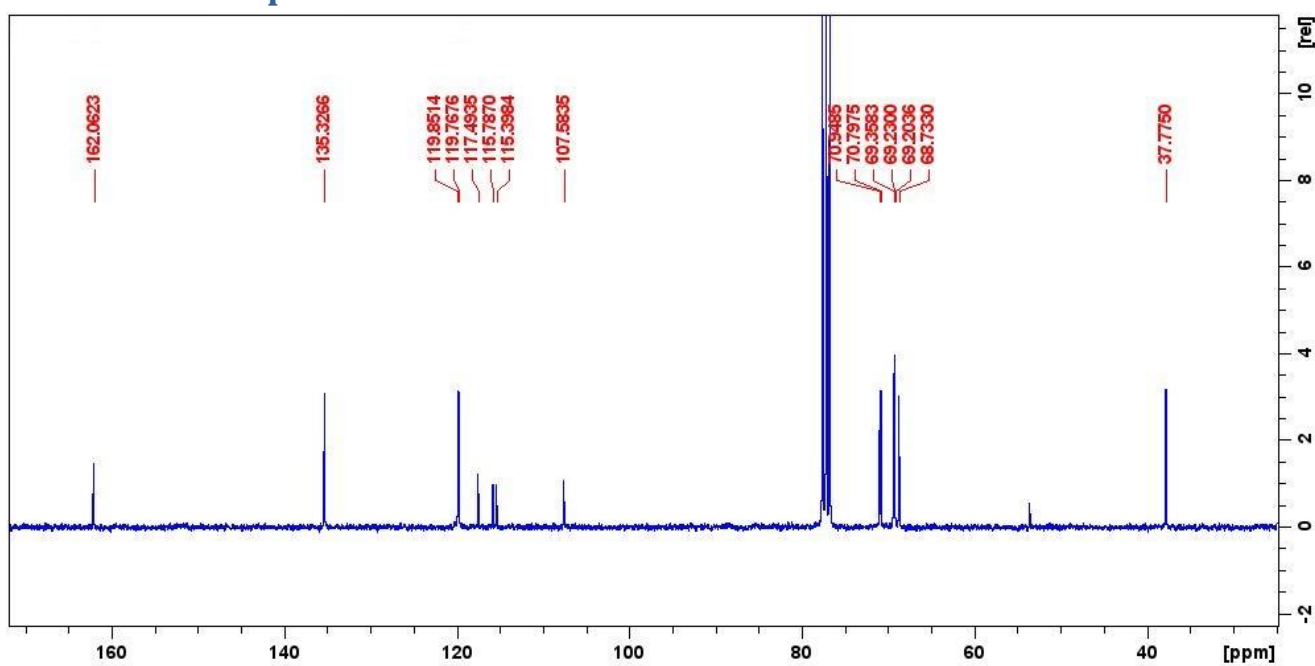

Figure S14.  $^{13}\text{C}$  NMR spectrum of **phthalonitrile 2** recorded in  $\text{CDCl}_3$ .



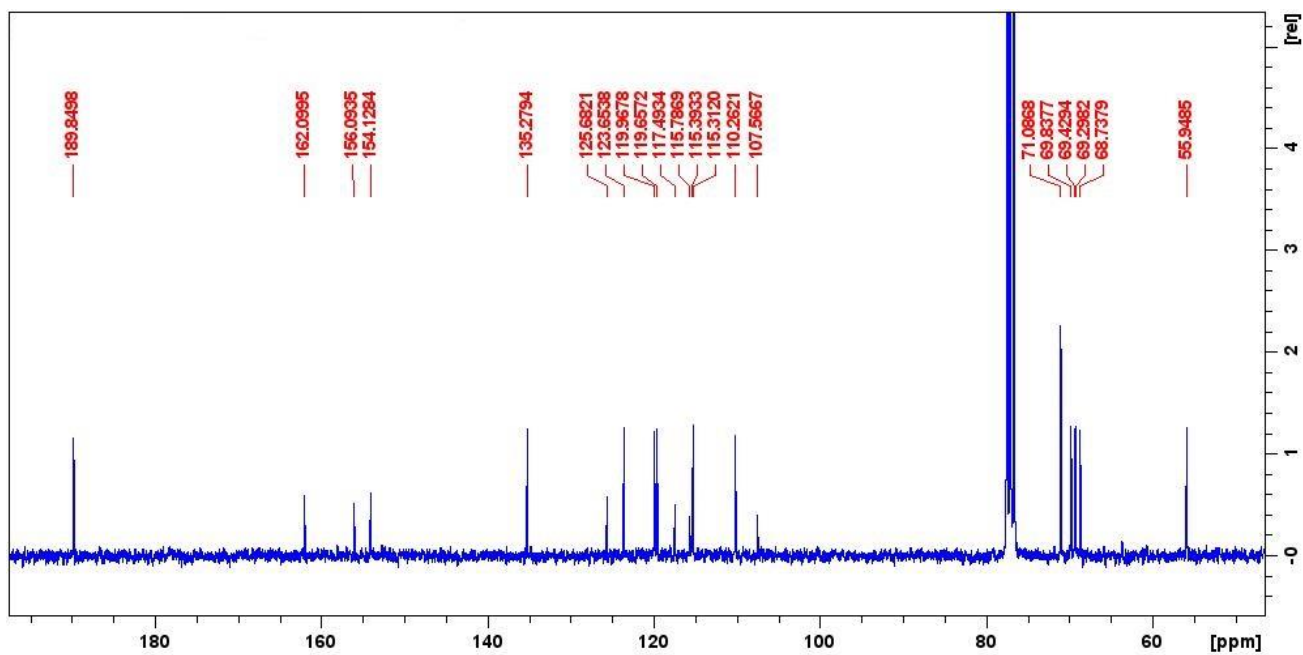

Figure S15.  $^{13}\text{C}$  NMR spectrum of phthalonitrile **3** recorded in  $\text{CDCl}_3$ .

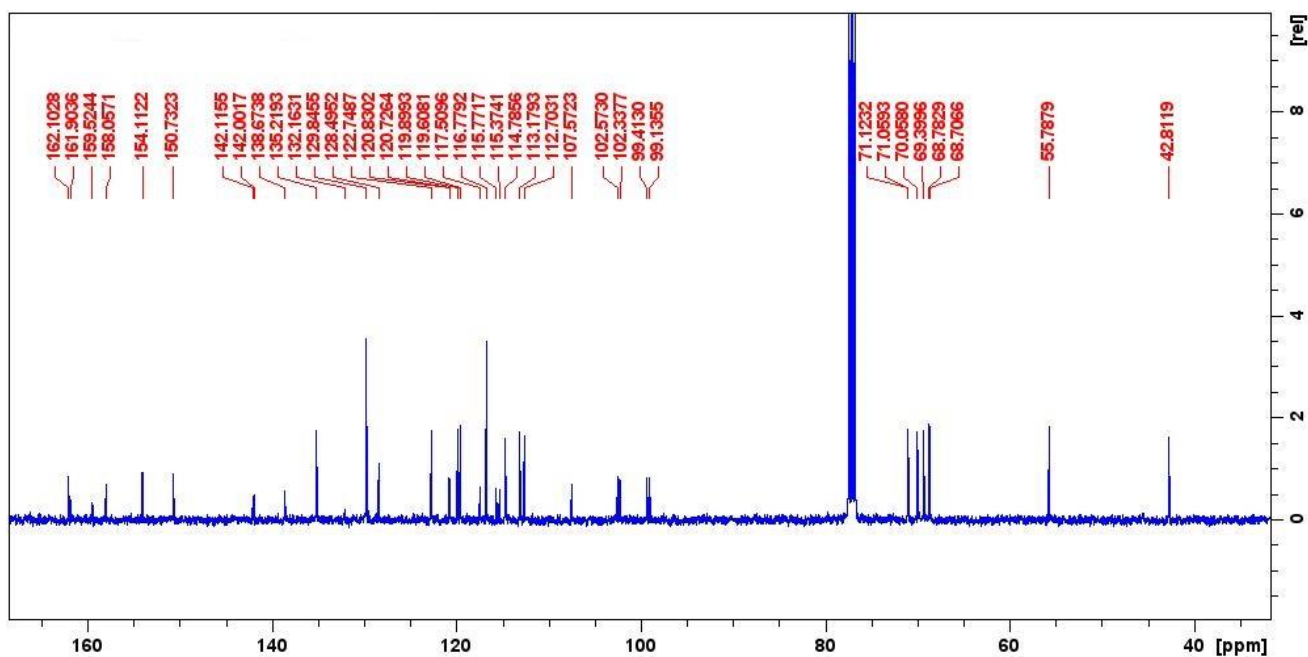

Figure S16.  $^{13}\text{C}$  NMR spectrum of phthalonitrile **5** recorded in  $\text{CDCl}_3$ .

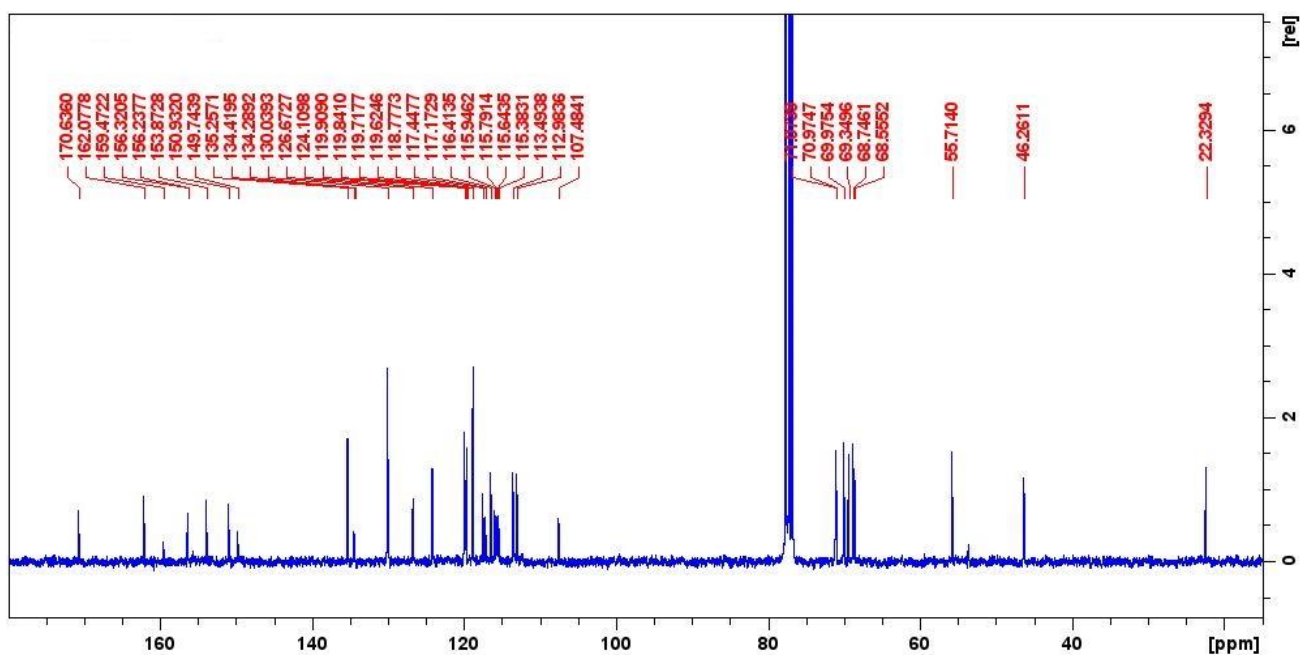

Figure S17.  $^{13}\text{C}$  NMR spectrum of phthalonitrile **6** recorded in  $\text{CDCl}_3$ .

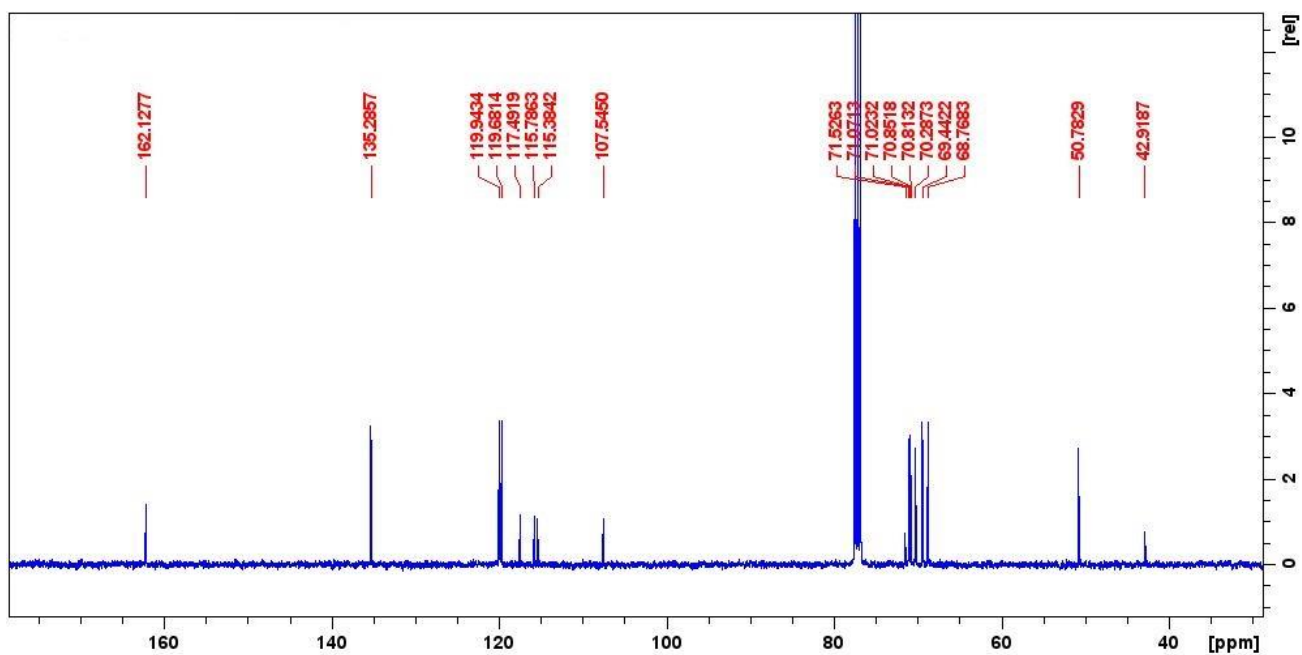

Figure S18.  $^{13}\text{C}$  NMR spectrum of phthalonitrile **8** recorded in  $\text{CDCl}_3$ .

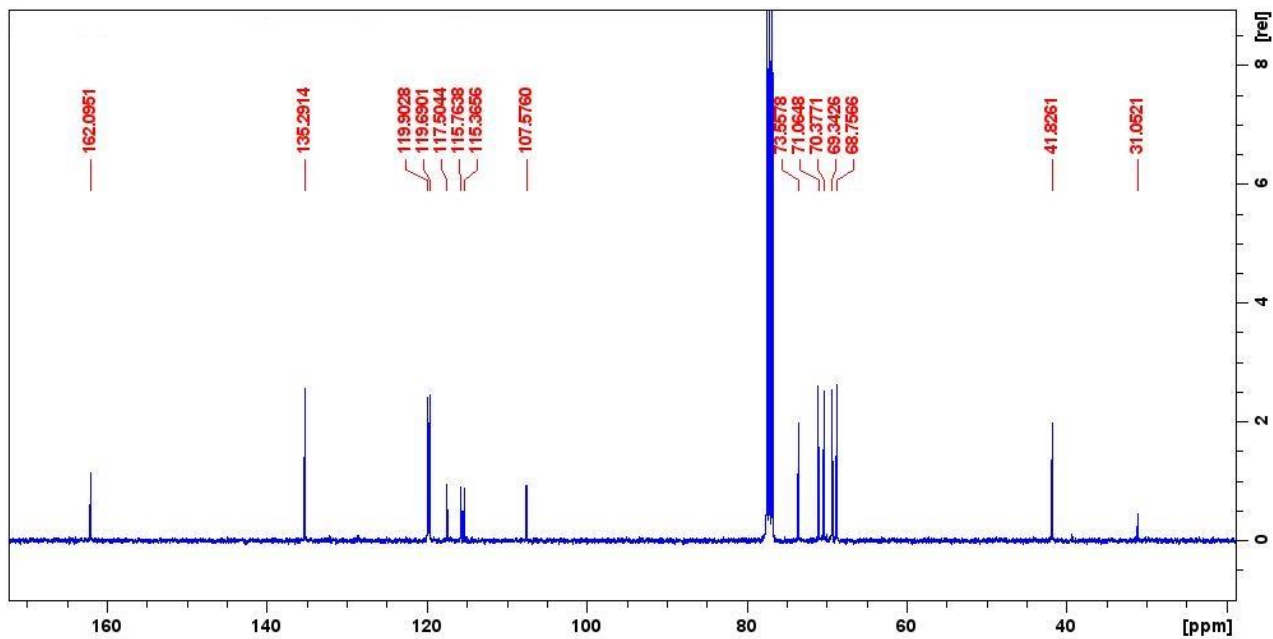

Figure S19.  $^{13}\text{C}$  NMR spectrum of **phthalonitrile 9** recorded in  $\text{CDCl}_3$ .

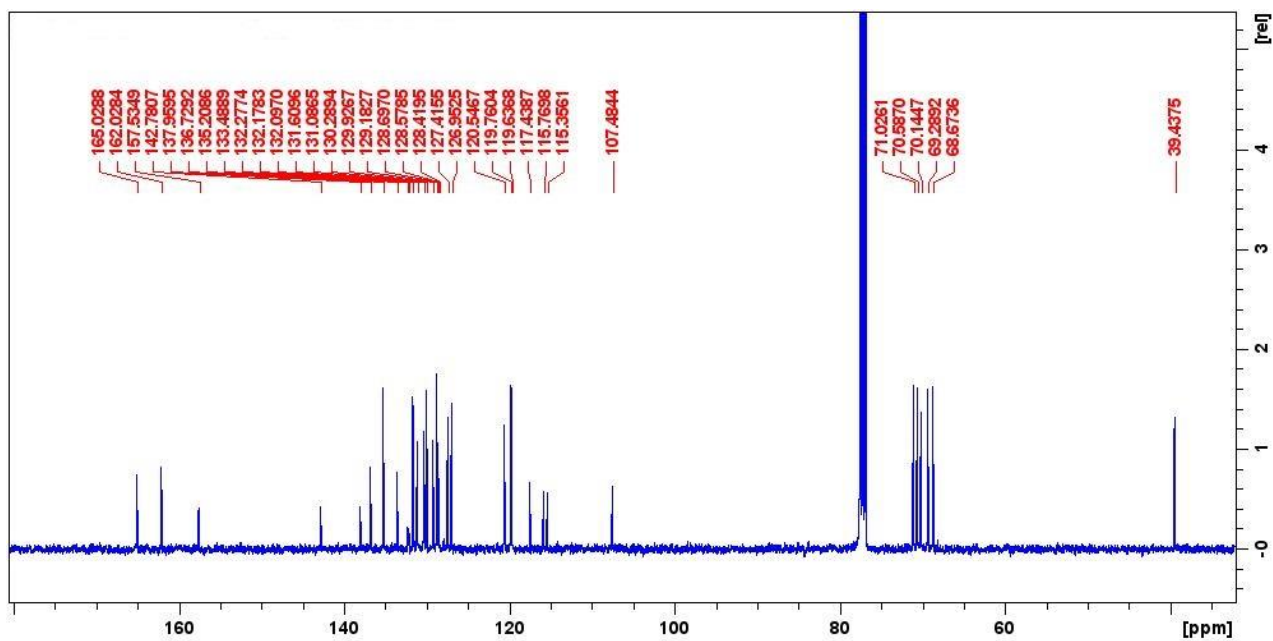

Figure S20.  $^{13}\text{C}$  NMR spectrum of **phthalonitrile 10** recorded in  $\text{CDCl}_3$ .

### 3. ES-MS spectra

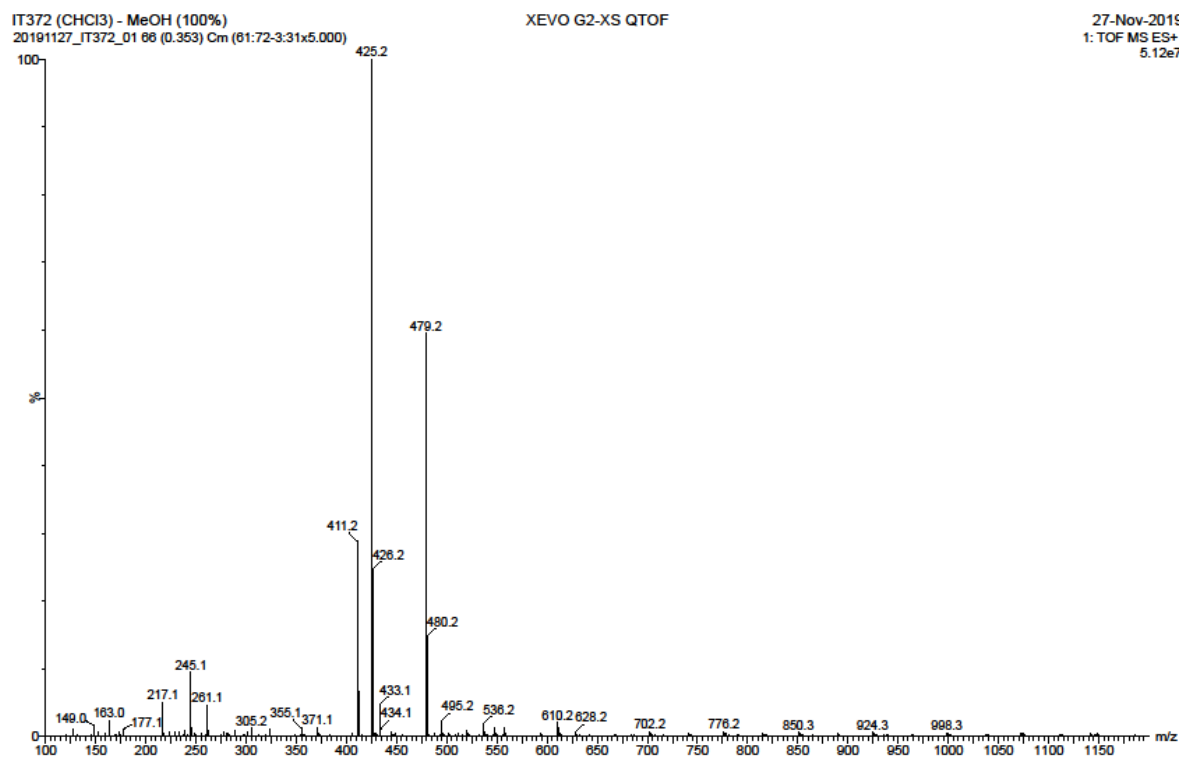

Figure S21. ES-MS spectra of phthalonitrile 3.

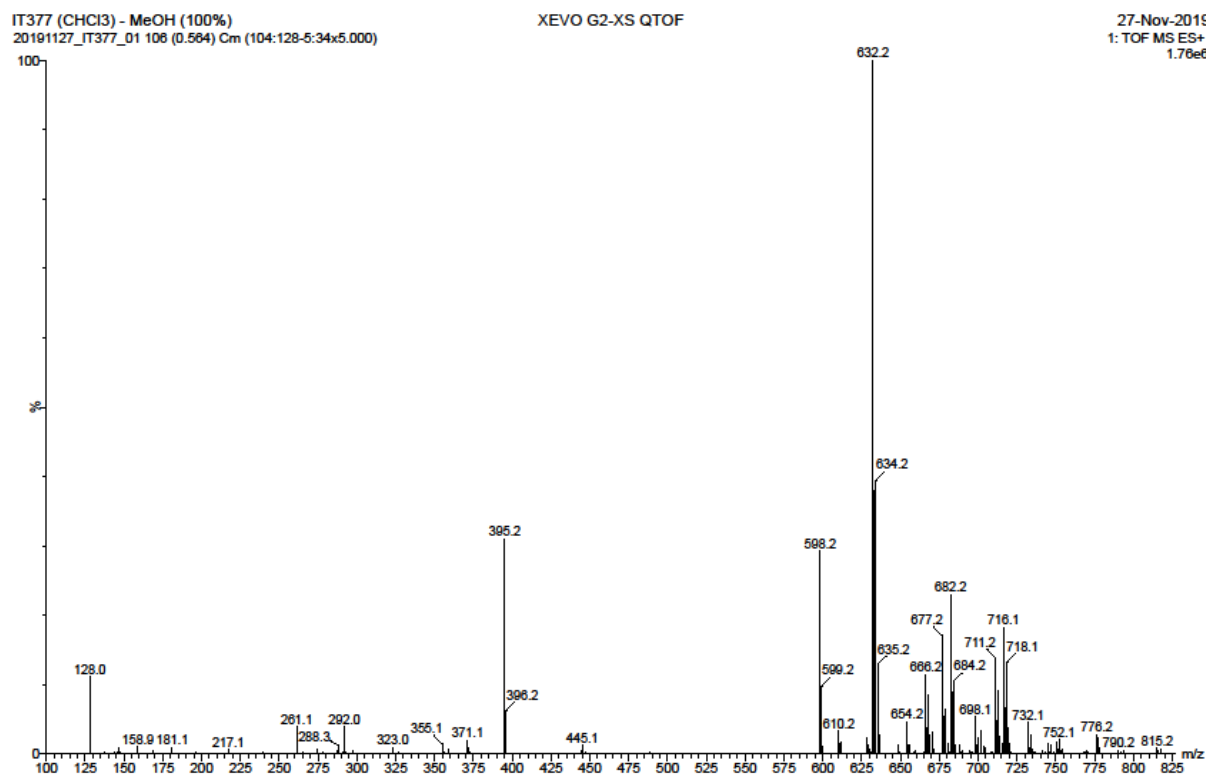

Figure S22. ES-MS spectra of phthalonitrile 5.

IT378 (CHCl3) - MeOH (100%)  
20191125\_IT378\_01 62 (0.640) Cm (54:74)

XEVO G2-XS QTOF

25-Nov-2019  
1: TOF MS ES+  
1.38e8

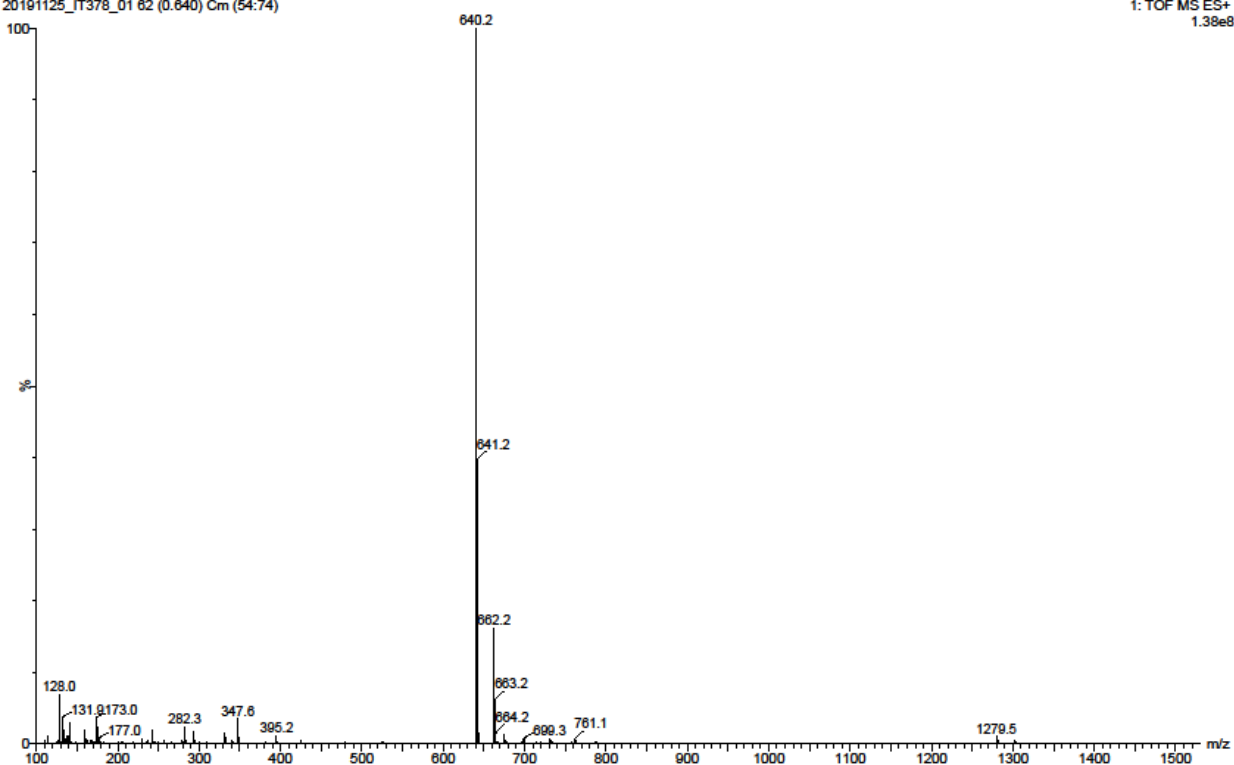

Figure S23. ES-MS spectra of phthalonitrile 6.

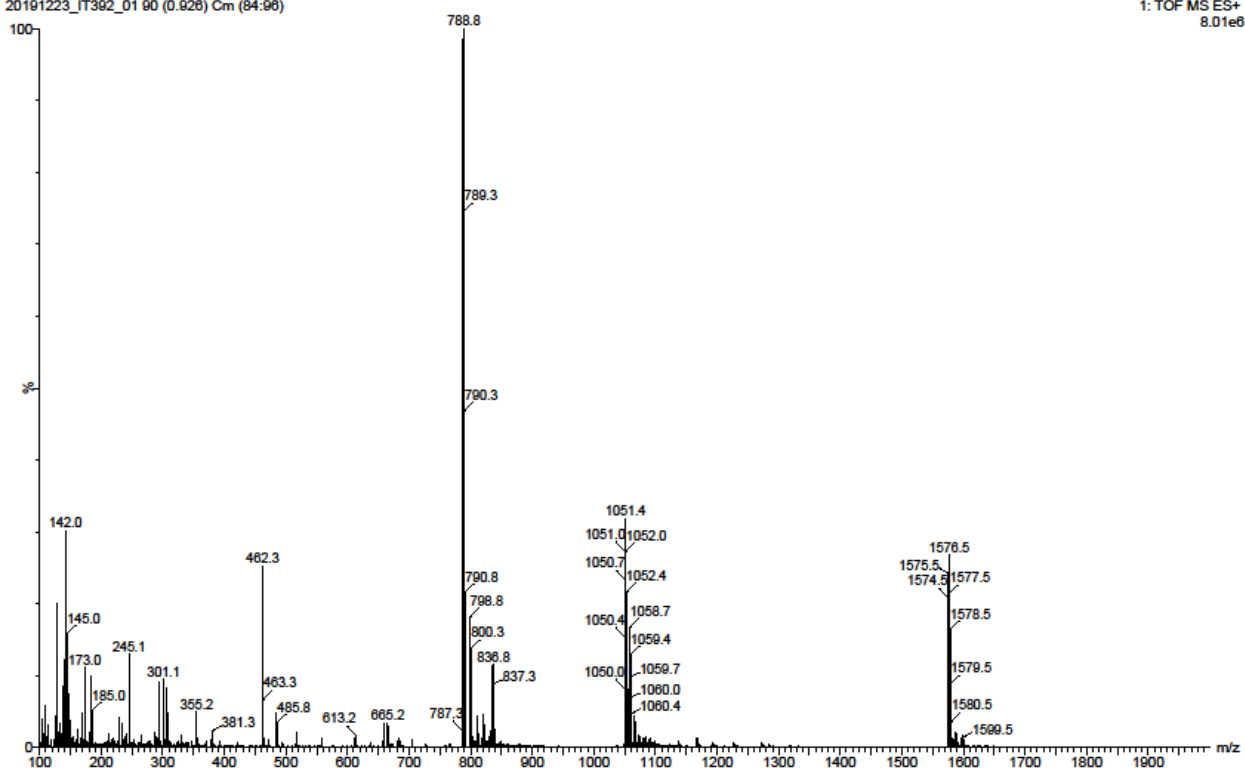

Figure S24. ES-MS spectra of ZnPc-[DAA1106]<sub>1</sub>.

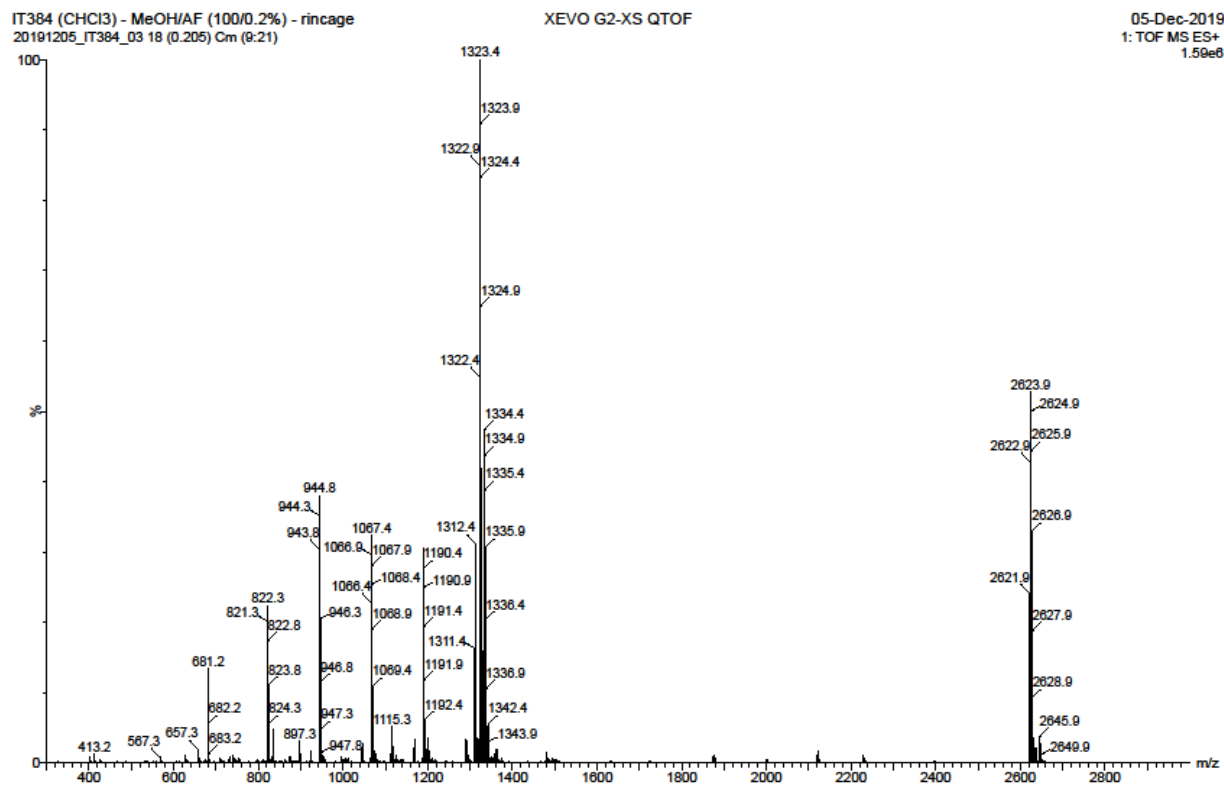

Figure S25. ES-MS spectra of ZnPc-[DAA1106]<sub>4</sub>.

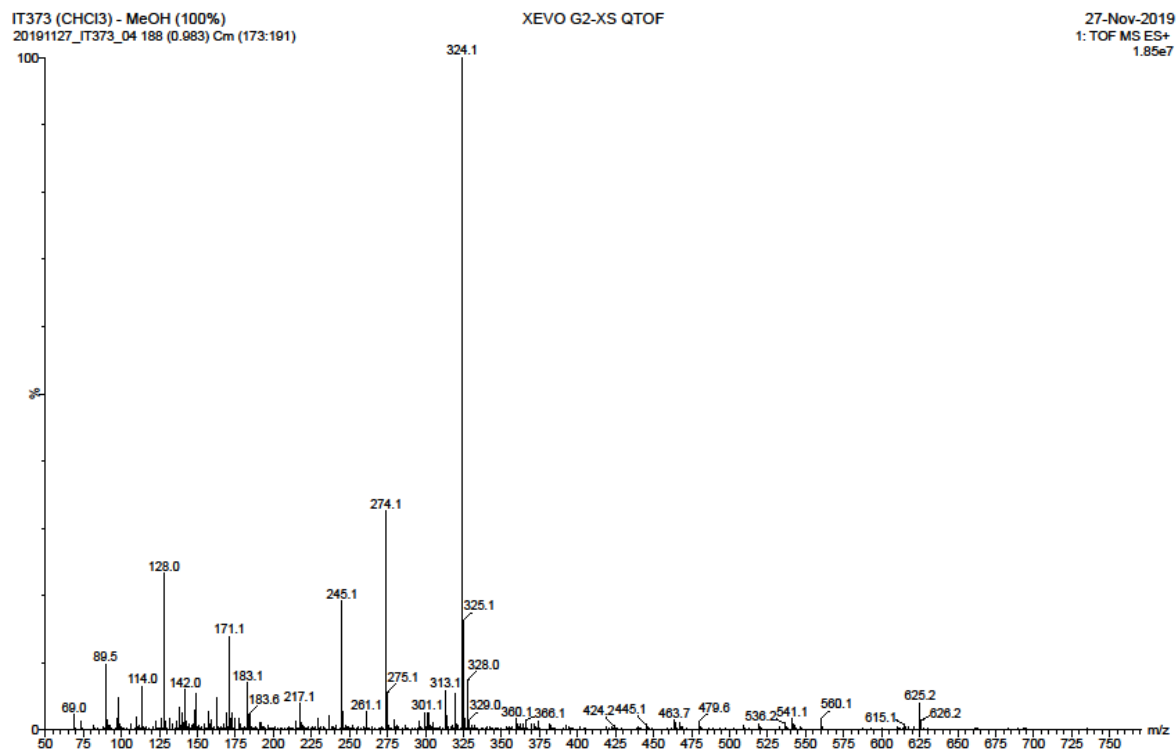

Figure S26. ES-MS spectra of phthalonitrile 8.

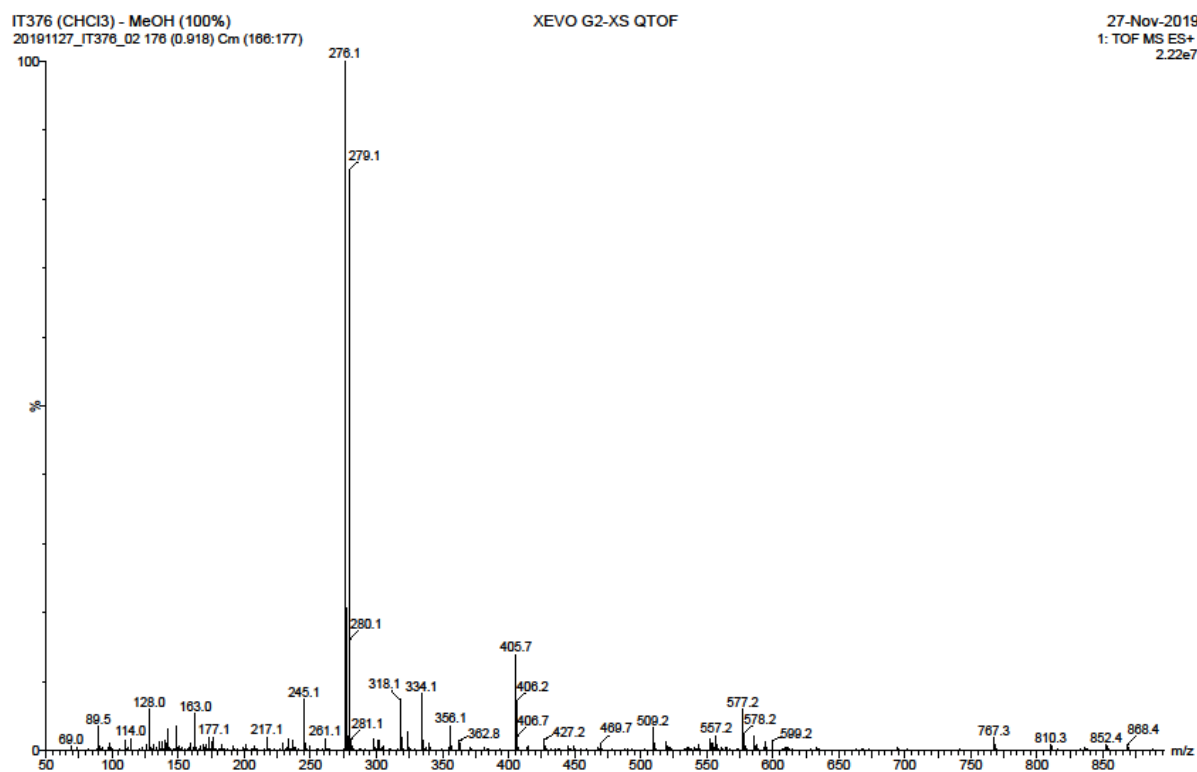

Figure S27. ES-MS spectra of phthalonitrile 9.

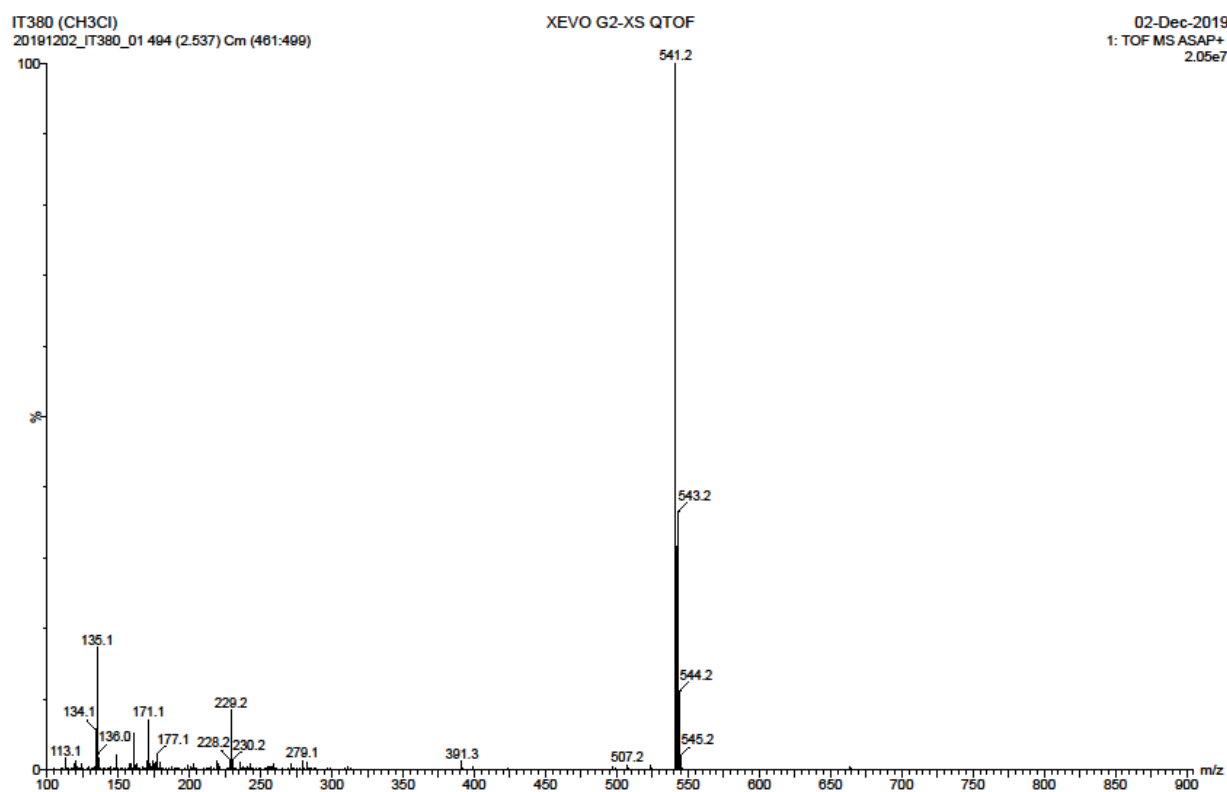

Figure S28. ES-MS spectra of phthalonitrile 10.



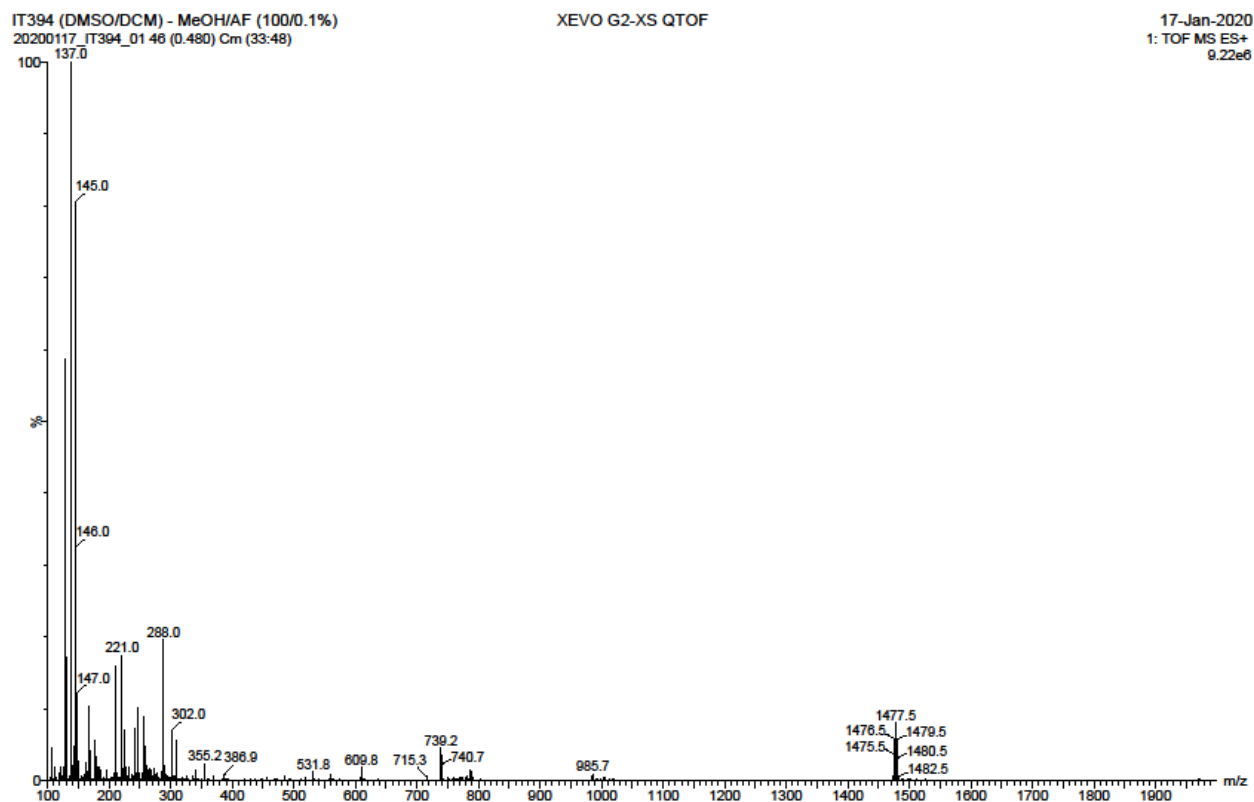

Figure S29. ES-MS spectra of ZnPc[PK11195]<sub>1</sub>.

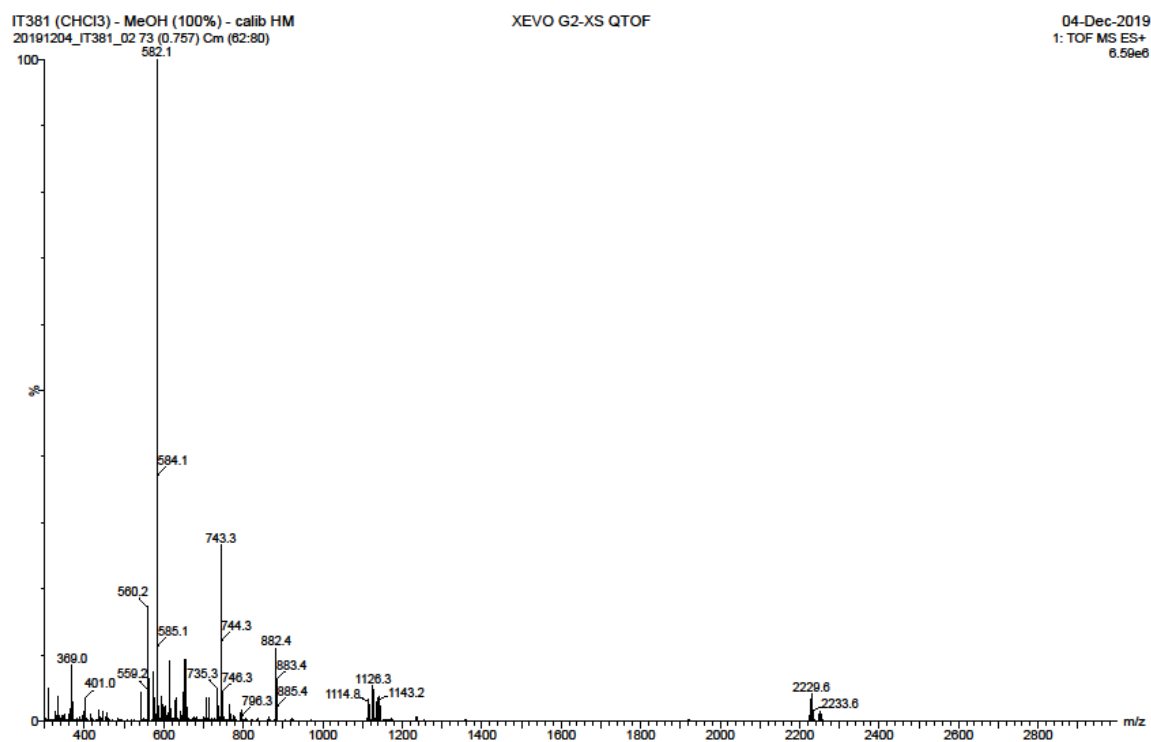

Figure S30. ES-MS spectra of ZnPc[PK11195]<sub>4</sub>.

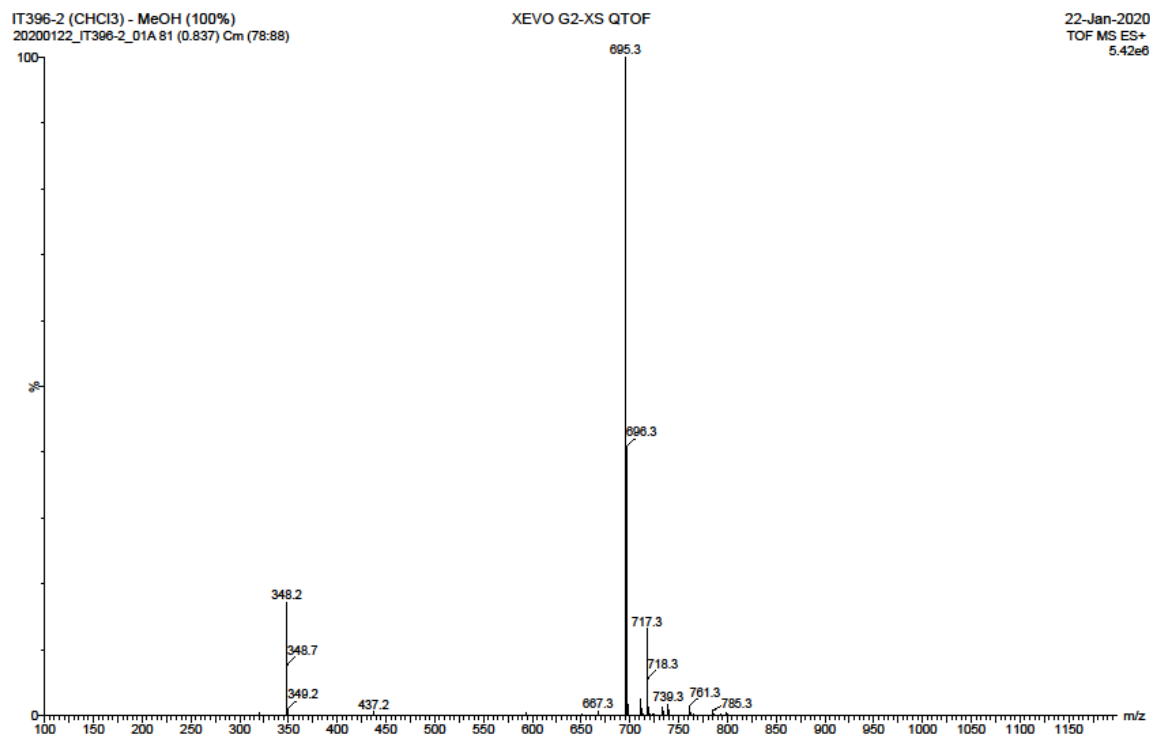

Figure S31. ES-MS spectra of **phthalonitrile 11**.

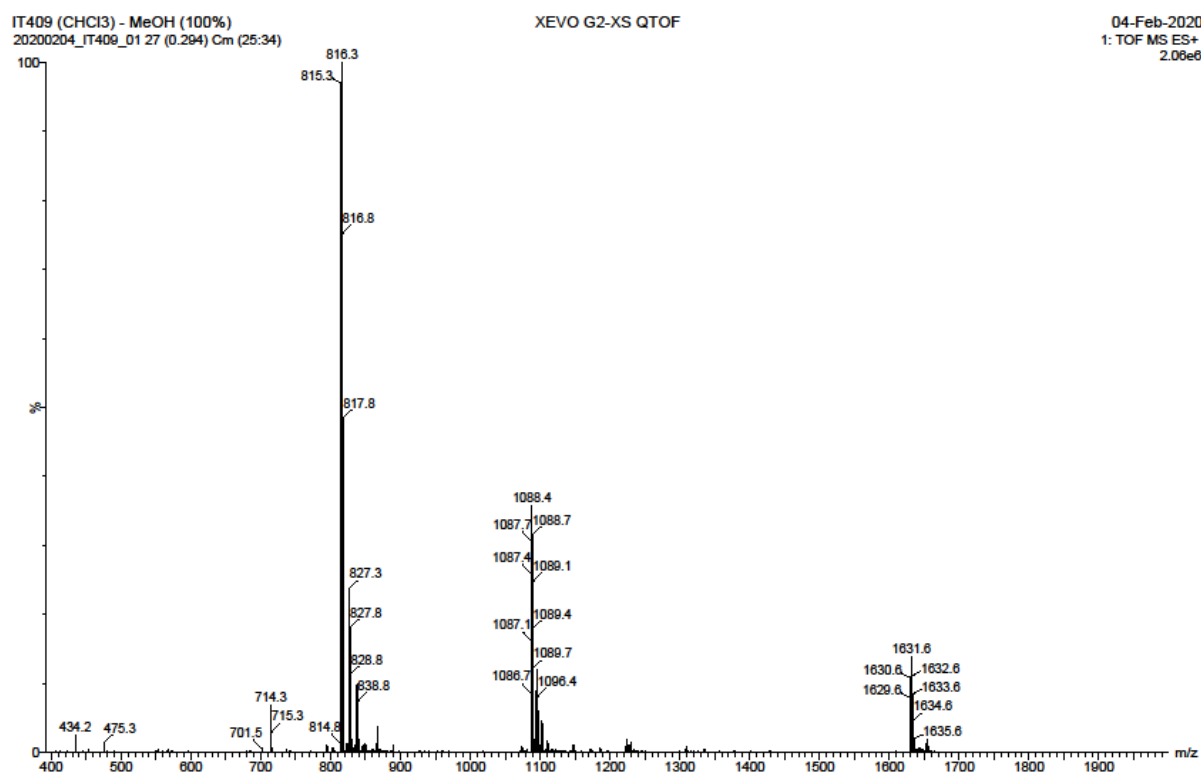

Figure S32. ES-MS spectra of **ZnPc-[Erl]<sub>1</sub>**.

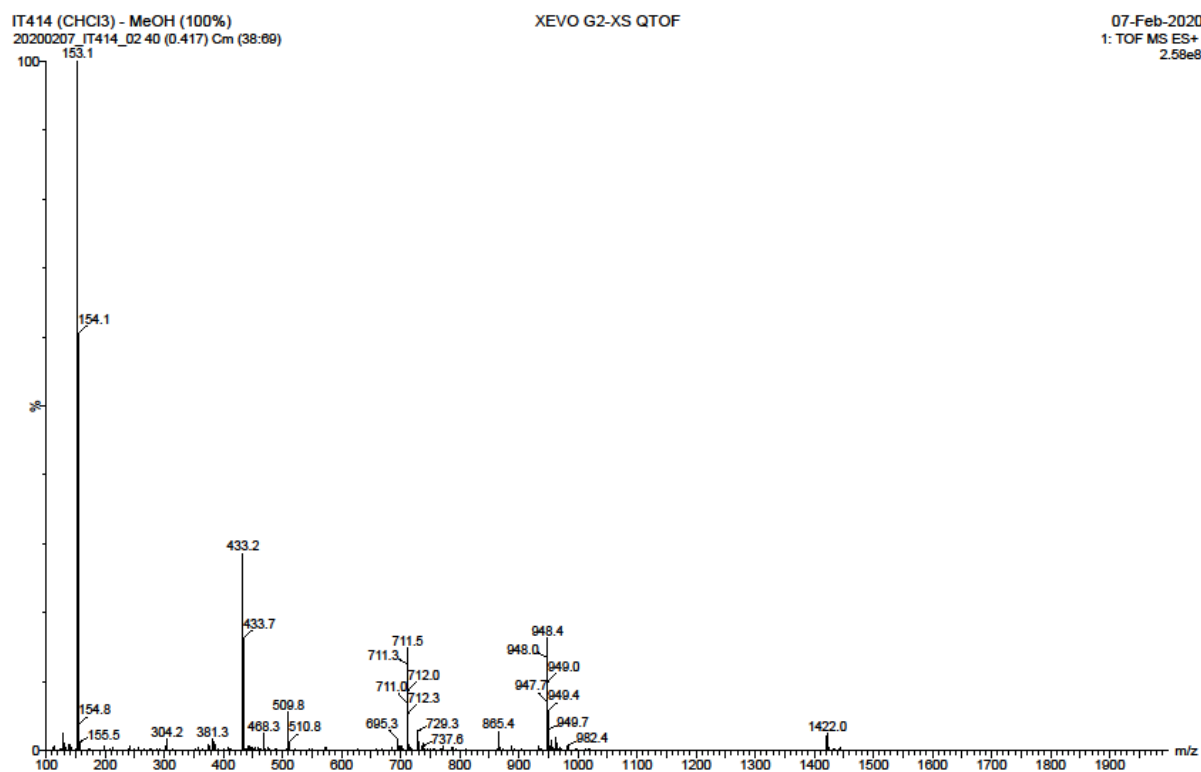

Figure S33. ES-MS spectra of ZnPc-[Erl]<sub>4</sub>.

#### 4. UV absorption spectra of targeting moieties

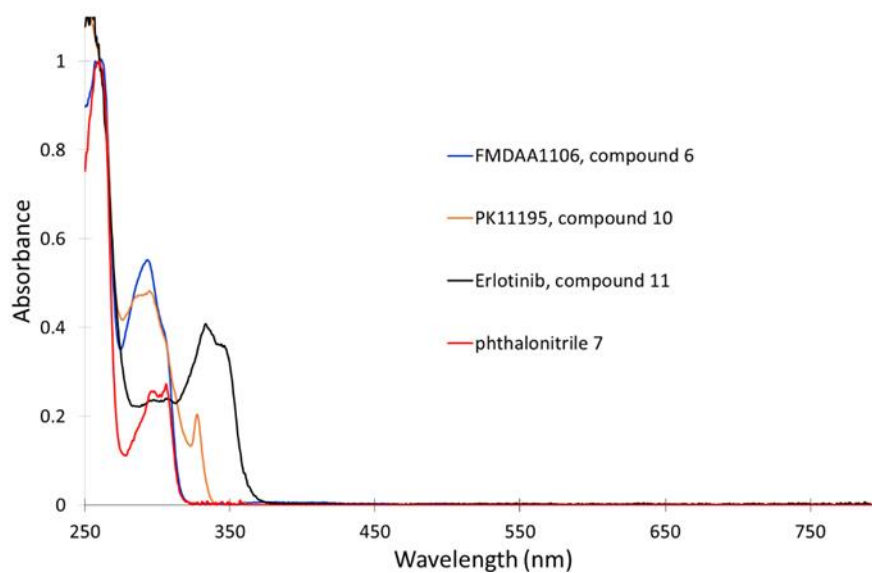

Figure S34. Normalized absorption spectra of targeting moieties recorded in CHCl<sub>3</sub>.

#### 4. HPLC analyses.

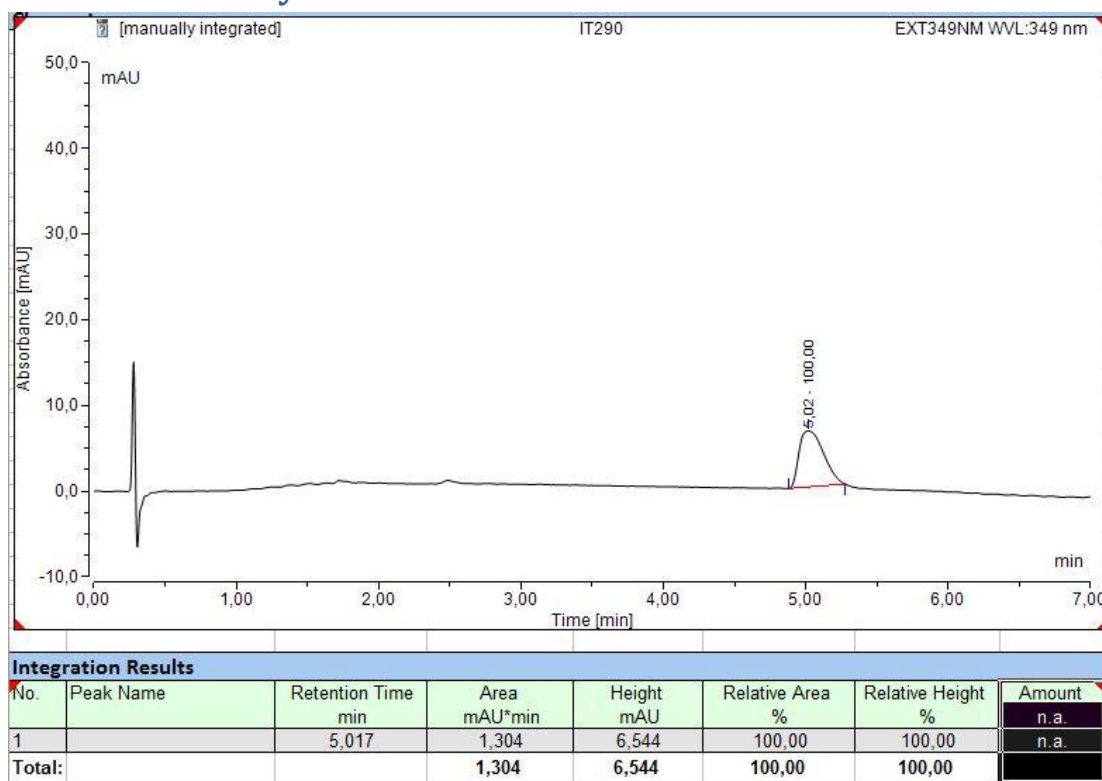

Figure S35. HPLC chromatogram of ZnPc(EG<sub>3</sub>)<sub>4</sub>.

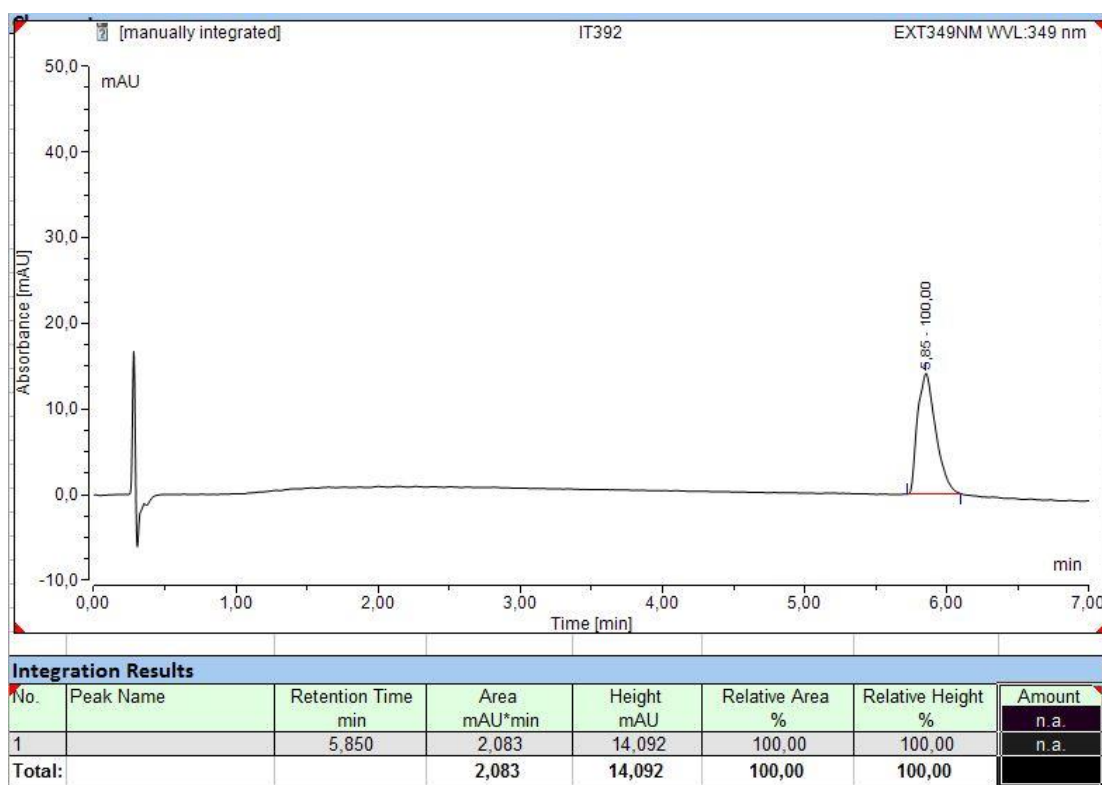

Figure S36. HPLC chromatogram of ZnPc-[DAA1106]<sub>1</sub>.

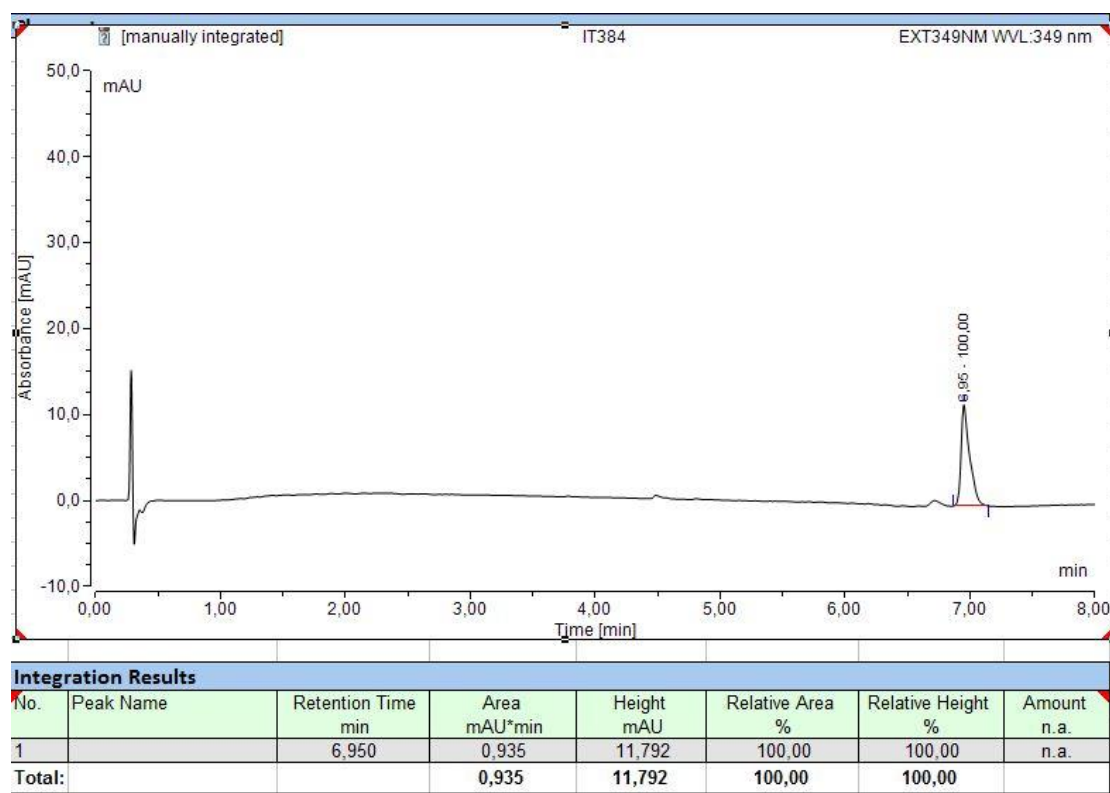

Figure S37. HPLC chromatogram of ZnPc-[DAA1106]<sub>4</sub>.

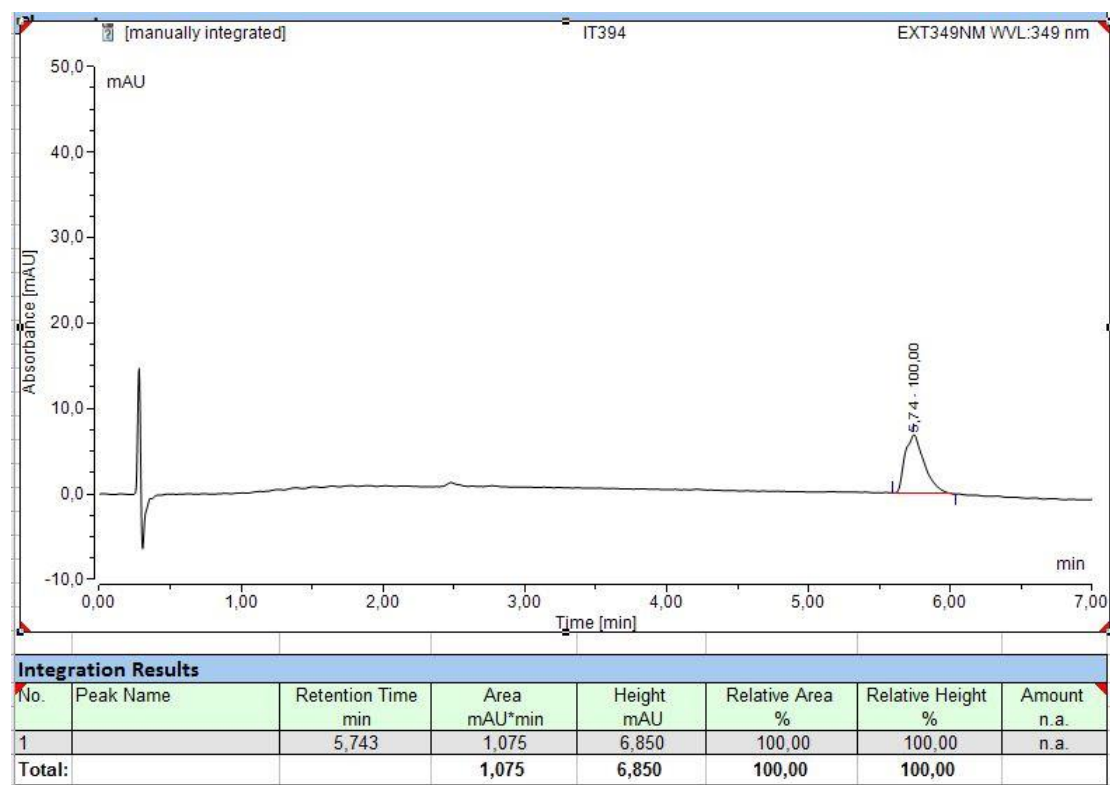

Figure S38. HPLC chromatogram of ZnPc-[PK11195]<sub>1</sub>.

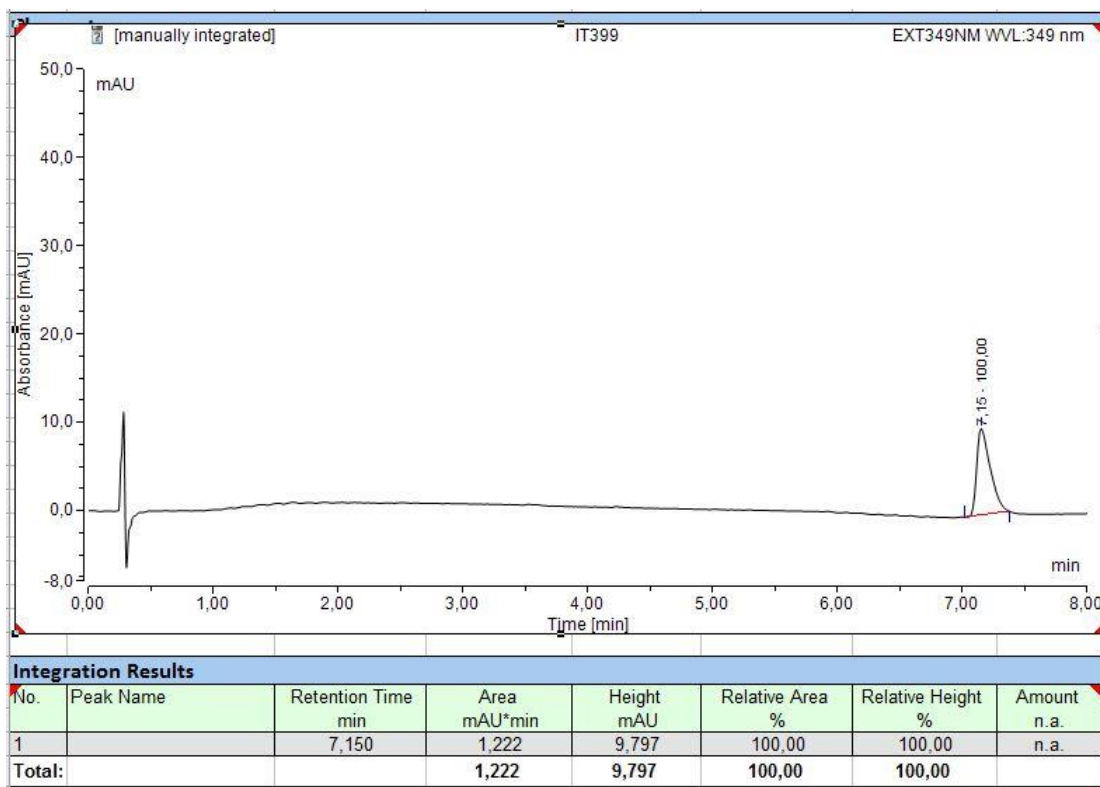

Figure S39. HPLC chromatogram of ZnPc-[PK11195]<sub>4</sub>.

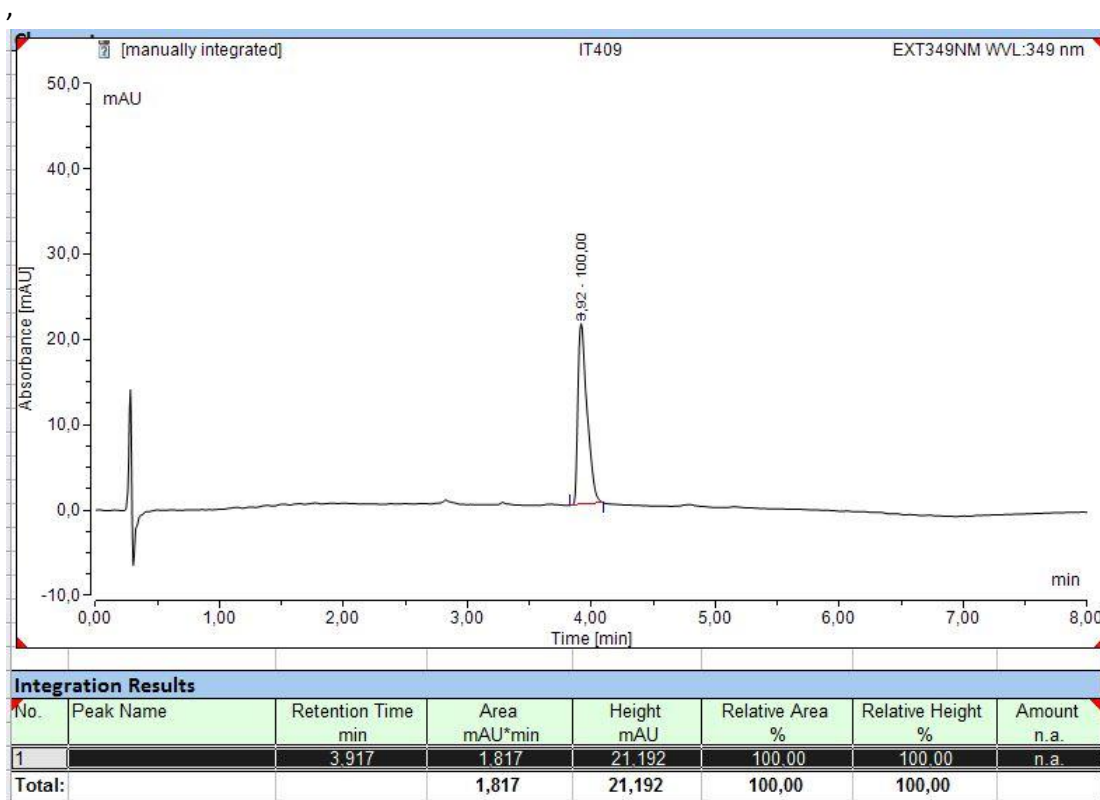

Figure S40. HPLC chromatogram of ZnPc-[Erlo]<sub>1</sub>.

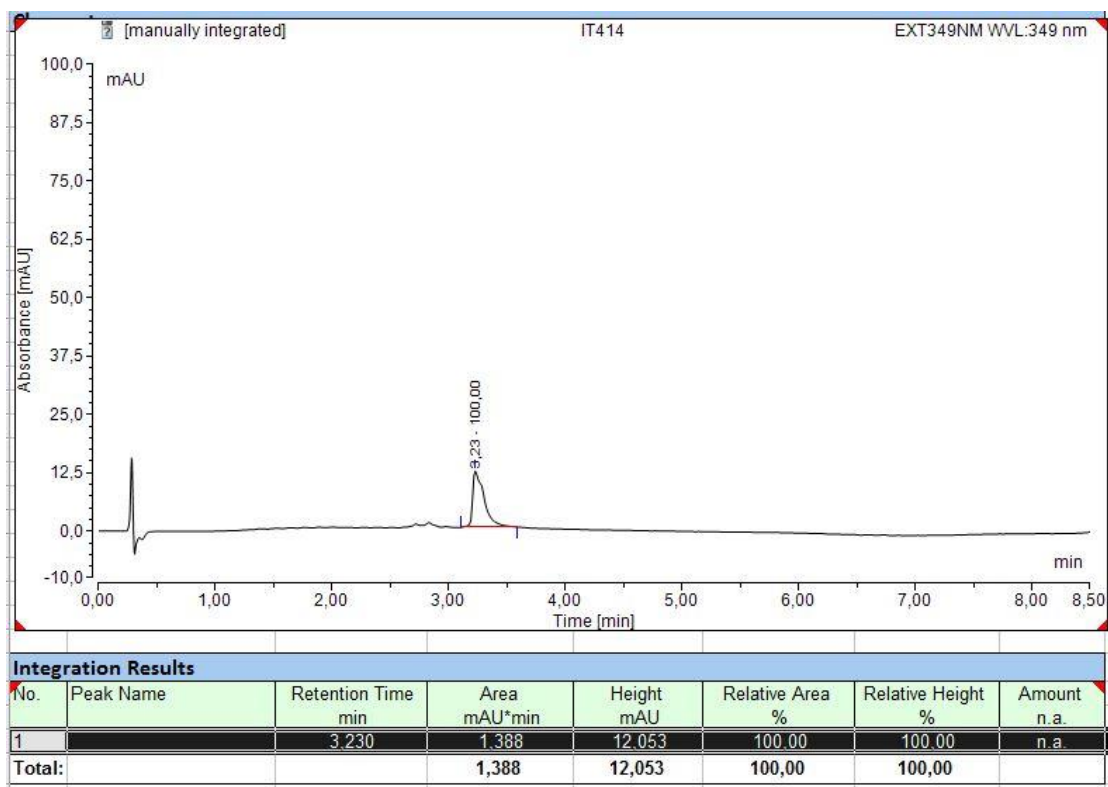

**Figure S41.** HPLC chromatogram of ZnPc-[Erl]<sub>4</sub>.
